# Supplementary material for: Metallomic Signatures of Lung Cancer and Chronic Obstructive Pulmonary Disease
Source: MDPI journal article supplement (doi:10.3390/ijms241814250), 2023-09-18
Supplement: s1 [file s1]

# Supplementary Material

## Metallomic Signatures of Lung Cancer and Chronic Obstructive Pulmonary Disease

Belén Callejón-Leblic <sup>1,†</sup>, Saida Sánchez Espirilla <sup>1,2,†</sup>, Carolina Gotera-Rivera <sup>3</sup>, Rafael Santana <sup>3</sup>, Isabel Díaz-Olivares <sup>4</sup>, José M. Marín <sup>5</sup>, Ciro Casanova Macario <sup>6</sup>, Borja García Cosío <sup>7</sup>, Antonia Fuster <sup>8</sup>, Ingrid Solanes García <sup>9</sup>, Juan Pablo Torres <sup>10</sup>, Nuria Feu Collado <sup>11</sup>, Carlos Cabrera Lopez <sup>12</sup>, Carlos Amado Diago <sup>13</sup>, Amparo Romero Plaza <sup>14</sup>, Luis Alejandro Padrón Fraysse <sup>15</sup>, Eduardo Márquez Martín <sup>16</sup>, Margarita Marín Royo <sup>17</sup>, Eva Balcells Vilarnau <sup>18</sup>, Antonia Lluell Casanovas <sup>19</sup>, Cristina Martínez González <sup>20</sup>, Juan Bautista Galdíz Iturri <sup>21</sup>, Celia Lacárcel Bautista <sup>22</sup>, José Luis Gómez-Ariza <sup>1</sup>, Antonio Pereira-Vega <sup>15</sup>, Luis Seijo <sup>23</sup>, José Luis López-Campos <sup>24,25</sup>, Germán Peces-Barba <sup>3,\*</sup> and Tamara García-Barrera <sup>1,\*</sup>

<sup>1</sup> Department of Chemistry, Research Center for Natural Resources, Health and the Environment (RENSMA), Faculty of Experimental Sciences, University of Huelva, Campus El Carmen, Fuerzas Armadas Ave., 21007 Huelva, Spain; belen.callejon@dqcm.uhu.es (B.C.-L.); saidik.s.05@gmail.com (S.S.E.); ariza@uhu.es (J.L.G.-A.).

<sup>2</sup> Department of Chemistry, Faculty of Sciences, National University of San Antonio Abad of Cusco, Av. de La Cultura, Cusco 773, Peru

<sup>3</sup> IIS-Jiménez Díaz Foundation, ISCIII-CIBERES, Reyes Católicos Ave., 28040 Madrid, Spain; carolina.gotera@fjd.es (C.G.-R.); rafael.santana@quironsalud.es (R.S.)

<sup>4</sup> Beturia Andalusian Foundation for Health Research (FABIS), Ronda Norte s/n, 21005 Huelva, Spain; fabis\_ne.tai.hujrj@fabis.org

<sup>5</sup> Miguel Servet Hospital-IIS Aragon, ISCIII-CIBERES, Paseo de Isabel la Católica, 1-3, 50009 Zaragoza, Spain; jmmarint@unizar.es

<sup>6</sup> Pulmonary Department—Research Unit, Hospital Universitario Nuestra Señora de Candelaria, CIBERES, ISCIII, Universidad de La Laguna, Padre Herrera, s/n, 38200 Santa Cruz de Tenerife, Spain; casanovacirol@gmail.com

<sup>7</sup> Son Espases Hospital, IdISBa, ISCIII-CIBERES, Valldemossa Road, 79, 07120 Palma De Mallorca, Spain; borja.cosio@ssib.es

<sup>8</sup> Son Llàtzer Hospital, C. de Manacor, 07198 Palma, Spain; afuster@hsl.es

<sup>9</sup> Santa Creu i Sant Pau Hospital, Carrer de St. Antoni Maria Claret, 167, 08025 Barcelona, Spain; isolanes@santpau.cat

<sup>10</sup> University Clinic of Navarra, Pío XII Ave., 36, 31008 Pamplona, Spain; jupa65@hotmail.com

<sup>11</sup> Reina Sofía Hospital, Maimonides Institute for Biomedical Research of Córdoba, Menéndez Pidal Ave., s/n, 14004 Córdoba, Spain; nurifeco@yahoo.es

<sup>12</sup> University Hospital of Gran Canaria Dr. Negrín, Respiratory Service, C. Pl. Barranco de la Ballena, s/n, 35010 Las Palmas de Gran Canarias, Spain; ccablopn@gmail.com

<sup>13</sup> Valdecilla Hospital, Valdecilla, s/n, 39008 Santander, Spain; amadodiago.carlos@gmail.com

<sup>14</sup> Manacor Hospital, Manacor Alcudia Road, s/n, 07500 Manacor, Spain; aromero@hmanacor.org

<sup>15</sup> Pneumology Area of the Juan Ramón Jiménez Hospital, Ronda Norte, s/n, 21005 Huelva, Spain; luispadronf@gmail.com (L.A.P.F.); apv01h@gmail.com (A.P.-V.)

<sup>16</sup> Virgen del Rocío Hospital, Institute of Biomedicine of Seville (IBiS), ISCIII-CIBERES, Manuel Siurot Ave. s/n, 41013 Seville, Spain; eduardomartinezmartin@gmail.com

<sup>17</sup> Castellón Hospital, Benicàssim Ave., 128, 12004 Castellón, Spain; marin\_marroy@gva.es

<sup>18</sup> Hospital del Mar, ISCIII-CIBERES, Paseo Marítimo de la Barceloneta, 25, 29, 08003 Barcelona, Spain; ebalcells@parcdesalutmar.cat

- <sup>19</sup> Terrassa Hospital, Torrebonica Road, s/n, 08227 Barcelona, Spain; allunell@cst.cat
- <sup>20</sup> Central Hospital of Asturias, Roma Ave. s/n, 33011 Oviedo, Spain; cmartinez@hca.es
- <sup>21</sup> Cruces University Hospital, ISCIII-CIBERES, Cruces Plaza, s/n, 48903 Baracaldo, Spain; med001901@hotmail.com
- <sup>22</sup> Jaén University Hospital, Av. del Ejército Español, 10, 23007 Jaén, Spain; celaba74@gmail.com
- <sup>23</sup> University Clinic of Navarra, ISCIII-CIBERES, Monforte de Lemos Ave., 28029 Madrid, Spain; lseijo@unav.es
- <sup>24</sup> Medical-Surgical Unit for Respiratory Diseases, Institute of Biomedicine of Seville (IBiS), Virgen del Rocío University Hospital, University of Seville, Manuel Siurot Ave. s/n, 41013 Sevilla, Spain; lopezcampos@us.es
- <sup>25</sup> Center for Biomedical Research in Respiratory Diseases Network (CIBERES), Carlos III Health Institute, Av. de Monforte de Lemos, 3-5, 28029 Madrid, Spain
- \* Correspondence: gpeces@quironsalud.es (G.P.-B.); tamara@dqcm.uhu.es (T.G.-B.)
- <sup>†</sup> These authors contributed equally to this work.

**Table S1.** Elemental concentration in human serum samples. Healthy Control (HC), Lung cancer (LC), Chronic Obstructive Pulmonary Disease (COPD), COPD patients who developed LC during the follow-up (COPD-LC), very severe COPD (COPD-vs), severe COPD (COPD-s), moderate COPD (COPD-mo) and mild COPD (COPD-mi); LOD: Limit of detection.

| Groups  | Parameters<br>(ng g <sup>-1</sup> ) | Mg       | Al   | V    | Mn   | Fe      | Co   | Ni   | Cu      | Zn      | Cr    | As    | Mo   | Se     | Cd   | Sb   | W    | Tl   | Pb   | U    |
|---------|-------------------------------------|----------|------|------|------|---------|------|------|---------|---------|-------|-------|------|--------|------|------|------|------|------|------|
| HC      | MEDIAN                              | 15509.24 | 3.02 | 0.06 | 1.03 | 965.46  | 0.16 | 2.17 | 925.96  | 659.94  | 1.00  | 16.54 | 0.66 | 81.40  | 0.04 | 1.36 | 0.07 | 0.04 | 1.14 | 0.07 |
|         | SEM                                 | 1217.79  | 0.36 | 0.01 | 0.07 | 103.52  | 0.02 | 0.26 | 100.92  | 56.11   | 0.10  | 1.47  | 0.16 | 3.60   | 0.01 | 0.14 | 0.02 | 0.01 | 0.15 | 0.02 |
|         | MAX                                 | 27513.22 | 8.11 | 0.41 | 2.39 | 3004.93 | 0.74 | 7.95 | 3473.49 | 1862.14 | 3.64  | 52.43 | 6.23 | 134.90 | 0.18 | 4.11 | 0.84 | 0.29 | 3.87 | 0.79 |
|         | MIN                                 | <LOD     | <LOD | <LOD | 0.40 | 11.01   | 0.01 | <LOD | 4.93    | 27.20   | 0.15  | <LOD  | <LOD | 31.54  | <LOD | <LOD | <LOD | 0.01 | <LOD | <LOD |
| LC      | MEDIAN                              | 14842.35 | 6.38 | 0.05 | 1.29 | 954.42  | 0.18 | 2.51 | 681.01  | 526.11  | 1.82  | 22.39 | 0.46 | 78.27  | 0.05 | 1.08 | 0.08 | 0.03 | 2.14 | 0.05 |
|         | SEM                                 | 744.61   | 0.42 | 0.01 | 0.07 | 86.47   | 0.04 | 0.27 | 38.96   | 33.01   | 0.54  | 0.89  | 0.06 | 4.84   | 0.01 | 0.08 | 0.01 | 0.00 | 0.11 | 0.01 |
|         | MAX                                 | 23819.81 | 9.54 | 0.46 | 2.50 | 3304.65 | 1.71 | 6.64 | 1447.83 | 1579.67 | 25.17 | 51.24 | 1.71 | 176.27 | 0.15 | 2.96 | 0.31 | 0.10 | 3.73 | 0.41 |
|         | MIN                                 | 2687.87  | <LOD | <LOD | 0.40 | 192.61  | 0.01 | <LOD | 160.85  | 141.64  | 0.62  | 13.02 | <LOD | 43.53  | <LOD | <LOD | <LOD | 0.01 | 0.01 | <LOD |
| COPD    | MEDIAN                              | 22650.46 | 2.08 | 0.06 | 0.95 | 927.10  | 0.22 | 1.44 | 1024.99 | 701.17  | 0.68  | 11.49 | 0.61 | 89.72  | 0.02 | 2.03 | 0.08 | 0.03 | 0.95 | 0.05 |
|         | SEM                                 | 988.00   | 0.20 | 0.01 | 0.13 | 74.40   | 0.07 | 0.09 | 54.67   | 40.48   | 0.05  | 1.03  | 0.08 | 4.14   | 0.00 | 0.16 | 0.02 | 0.00 | 0.16 | 0.01 |
|         | MAX                                 | 32825.56 | 4.24 | 0.32 | 5.36 | 2595.21 | 3.84 | 4.07 | 1806.49 | 1438.55 | 3.38  | 44.53 | 3.73 | 153.16 | 0.16 | 4.44 | 0.80 | 0.08 | 6.38 | 0.52 |
|         | MIN                                 | <LOD     | <LOD | <LOD | <LOD | 5.16    | <LOD | 0.81 | 2.13    | 12.00   | 0.27  | <LOD  | <LOD | <LOD   | <LOD | <LOD | 0.02 | 0.01 | <LOD | 0.01 |
| COPD-LC | MEDIAN                              | 24849.43 | 0.06 | 0.02 | 0.42 | 961.41  | 0.18 | 2.97 | 959.26  | 1017.81 | 0.62  | 3.78  | 0.54 | 108.41 | 0.01 | 1.86 | 0.05 | 0.02 | 0.05 | 0.02 |
|         | SEM                                 | 644.68   | 0.01 | 0.01 | 0.04 | 54.77   | 0.04 | 0.07 | 45.08   | 62.15   | 0.01  | 0.42  | 0.06 | 2.24   | 0.00 | 0.14 | 0.00 | 0.00 | 0.03 | 0.00 |
|         | MAX                                 | 29399.91 | 0.25 | 0.12 | 0.90 | 1656.91 | 0.98 | 3.93 | 1479.91 | 1851.67 | 0.71  | 8.76  | 1.31 | 140.22 | 0.02 | 4.58 | 0.07 | 0.04 | 0.59 | 0.03 |
|         | MIN                                 | 14659.82 | <LOD | <LOD | 0.11 | 380.60  | 0.04 | 2.39 | 535.35  | 468.37  | 0.53  | 0.35  | <LOD | 79.11  | <LOD | 0.46 | 0.03 | 0.01 | <LOD | 0.02 |
| COPD-mi | MEDIAN                              | 21914.01 | 2.14 | 0.06 | 0.90 | 874.89  | 0.29 | 1.51 | 937.78  | 699.94  | 0.73  | 10.40 | 0.55 | 84.72  | 0.02 | 1.89 | 0.05 | 0.03 | 0.94 | 0.03 |
|         | SEM                                 | 1150.35  | 0.21 | 0.01 | 0.10 | 64.01   | 0.10 | 0.10 | 55.90   | 44.62   | 0.07  | 0.89  | 0.04 | 4.36   | 0.00 | 0.16 | 0.01 | 0.00 | 0.16 | 0.00 |
|         | MAX                                 | 32825.56 | 4.24 | 0.20 | 3.44 | 1844.76 | 3.84 | 3.79 | 1806.49 | 1371.43 | 3.38  | 21.43 | 1.25 | 137.11 | 0.16 | 3.93 | 0.28 | 0.06 | 5.47 | 0.08 |
|         | MIN                                 | <LOD     | <LOD | <LOD | <LOD | 5.16    | <LOD | 0.81 | 2.13    | 12.00   | 0.27  | <LOD  | <LOD | <LOD   | <LOD | <LOD | 0.02 | 0.01 | <LOD | 0.01 |
| COPD-mo | MEDIAN                              | 25859.84 | 1.43 | 0.05 | 0.44 | 822.19  | 0.20 | 1.74 | 1084.55 | 702.95  | 0.63  | 12.61 | 0.58 | 104.07 | 0.02 | 2.32 | 0.14 | 0.02 | 0.86 | 0.03 |
|         | SEM                                 | 629.20   | 0.21 | 0.01 | 0.03 | 52.09   | 0.02 | 0.14 | 38.34   | 25.05   | 0.01  | 2.03  | 0.05 | 3.53   | 0.00 | 0.20 | 0.04 | 0.00 | 0.13 | 0.00 |
|         | MAX                                 | 31387.92 | 2.89 | 0.13 | 0.86 | 1607.28 | 0.46 | 4.07 | 1309.29 | 973.62  | 0.85  | 44.53 | 1.29 | 143.64 | 0.04 | 4.21 | 0.80 | 0.03 | 1.89 | 0.06 |
|         | MIN                                 | 18925.88 | <LOD | <LOD | 0.16 | 517.01  | 0.08 | 1.05 | 531.61  | 544.42  | 0.53  | 1.80  | 0.36 | 73.54  | <LOD | <LOD | <LOD | <LOD | <LOD | <LOD |
| COPD-s  | MEDIAN                              | 25616.74 | 0.66 | 0.04 | 0.68 | 1290.08 | 0.26 | 1.11 | 1224.68 | 872.30  | 0.63  | 7.10  | 0.84 | 101.16 | 0.01 | 1.63 | 0.06 | 0.02 | 0.36 | 0.03 |
|         | SEM                                 | 621.44   | 0.17 | 0.01 | 0.04 | 80.94   | 0.04 | 0.02 | 54.53   | 36.06   | 0.01  | 1.09  | 0.08 | 3.59   | 0.00 | 0.20 | 0.00 | 0.00 | 0.07 | 0.00 |
|         | MAX                                 | 29707.92 | 2.83 | 0.18 | 1.00 | 2159.52 | 0.68 | 1.28 | 1722.26 | 1186.07 | 0.73  | 20.36 | 1.74 | 142.33 | 0.03 | 3.69 | 0.08 | 0.02 | 1.09 | 0.05 |
|         | MIN                                 | 17624.57 | <LOD | <LOD | 0.17 | 375.66  | 0.05 | 0.88 | 713.06  | 465.13  | 0.56  | 0.76  | 0.08 | 70.57  | <LOD | <LOD | 0.02 | 0.01 | <LOD | 0.02 |
| COPD-vs | MEDIAN                              | 21313.86 | 2.85 | 0.08 | 1.33 | 893.54  | 0.12 | 1.35 | 1053.77 | 629.07  | 0.65  | 14.65 | 0.62 | 87.20  | 0.03 | 2.32 | 0.10 | 0.03 | 1.28 | 0.08 |
|         | SEM                                 | 877.65   | 0.12 | 0.01 | 0.18 | 87.98   | 0.01 | 0.08 | 55.19   | 37.49   | 0.02  | 0.28  | 0.12 | 3.98   | 0.00 | 0.13 | 0.02 | 0.00 | 0.19 | 0.02 |
|         | MAX                                 | 31005.20 | 4.00 | 0.32 | 5.36 | 2595.21 | 0.25 | 3.49 | 1763.68 | 1438.55 | 1.20  | 19.16 | 3.73 | 153.16 | 0.07 | 4.44 | 0.56 | 0.08 | 6.38 | 0.52 |
|         | MIN                                 | 10693.36 | <LOD | <LOD | 0.17 | 274.44  | 0.04 | 0.89 | 379.53  | 278.66  | 0.50  | 11.78 | 0.09 | 37.27  | <LOD | 1.31 | 0.03 | 0.02 | 0.12 | 0.02 |
| LOD     |                                     | 0.08     | 0.06 | 0.02 | 0.04 | 0.05    | 0.05 | 0.04 | 0.05    | 0.07    | 0.04  | 0.03  | 0.04 | 0.03   | 0.01 | 0.04 | 0.04 | 0.02 | 0.04 | 0.02 |

**Table S2.** Fold changes, p-values from Krustal-Wallis test for significant differences and AUC values from ROC curves calculated using the concentration of elements in human serum. There were not any significant differences found between the comparisons: COPD-mo vs COPD-mi, COPD-se vs COPD-mi, COPD-vs vs COPD-mi, COPD-s vs COPD-mo. Significant differences ( $p < 0.05$ ) are shown in the table in red color. FC: fold change; AUC: area under the curve of the receiver operating curve (ROC); NS: not significant; HC: Healthy control; LC: lung cancer; COPD: chronic obstructively pulmonary disease; COPD-LC: patients who developed LC during the follow-up; COPD-vs: very severe COPD; COPD-s: severe COPD, COPD-mo: moderate COPD and COPD-mi: mild COPD.

| Comparison  | Values  | Elements |       |       |      |      |      |      |      |      |      |      |       |       |      |       |      |      |      |       |
|-------------|---------|----------|-------|-------|------|------|------|------|------|------|------|------|-------|-------|------|-------|------|------|------|-------|
|             |         | Al       | As    | Cd    | Co   | Cr   | Cu   | Fe   | Mg   | Mn   | Mo   | Ni   | Pb    | Sb    | Se   | Tl    | U    | V    | W    | Zn    |
| LC/HC       | FC      | 2.35     | 1.35  | 1.23  | 1.16 | 1.82 | 0.74 | 0.99 | 0.96 | 1.26 | 0.71 | 1.16 | 1.87  | 0.80  | 0.96 | 0.87  | 0.74 | 0.84 | 1.18 | 0.80  |
|             | p-value | 0.00     | 0.00  | NS    | NS   | NS   | NS   | NS   | NS   | 0.00 | NS   | NS   | 0.00  | NS    | NS   | NS    | NS   | NS   | NS   | NS    |
|             | AUC     | 0.82     | 0.77  | -     | -    | -    | -    | -    | -    | 0.70 | -    | -    | 0.89  | -     | -    | -     | -    | -    | -    | -     |
| COPD/HC     | FC      | 0.81     | 0.68  | 0.59  | 1.20 | 0.88 | 1.00 | 0.89 | 1.38 | 0.81 | 0.94 | 1.09 | 0.92  | 1.33  | 1.05 | 0.67  | 0.56 | 0.91 | 1.31 | 1.04  |
|             | p       | NS       | 0.00  | 0.02  | NS   | NS   | NS   | NS   | 0.00 | NS   | NS   | NS   | NS    | 0.01  | NS   | 0.04  | NS   | NS   | NS   | NS    |
|             | AUC     | -        | <0.70 | <0.70 | -    | -    | -    | -    | 0.73 | -    | -    | -    | -     | <0.70 | -    | <0.70 | -    | -    | -    | -     |
| LC/COPD     | FC      | 4.03     | 2.16  | 2.51  | 0.99 | 2.65 | 0.69 | 1.12 | 0.67 | 1.60 | 0.86 | 1.25 | 2.74  | 0.57  | 0.89 | 1.25  | 1.29 | 1.04 | 1.16 | 0.75  |
|             | p-value | 0.00     | 0.00  | 0.00  | NS   | 0.01 | 0.00 | NS   | 0.00 | 0.00 | NS   | NS   | 0.00  | 0.00  | NS   | 0.01  | NS   | NS   | NS   | 0.00  |
|             | AUC     | 0.88     | 0.96  | <0.70 | -    | 0.91 | 0.78 | -    | 0.84 | 0.83 | -    | -    | 0.90  | 0.79  | -    | -     | -    | -    | -    | <0.70 |
| COPD-LC/HC  | FC      | 0.02     | 0.23  | 0.08  | 1.12 | 0.63 | 1.04 | 1.00 | 1.60 | 0.41 | 0.82 | 1.37 | 0.04  | 1.37  | 1.33 | 0.57  | 0.34 | 0.42 | 0.72 | 1.54  |
|             | p-value | 0.00     | 0.00  | 0.01  | NS   | NS   | NS   | NS   | 0.00 | 0.00 | NS   | 0.00 | 0.00  | NS    | 0.00 | NS    | NS   | NS   | NS   | NS    |
|             | AUC     | 0.71     | 0.79  | 0.83  | -    | 0.74 | -    | -    | 0.80 | 0.89 | -    | 0.89 | 0.90  | -     | 0.78 | -     | -    | -    | -    | -     |
| COPD-mi/HC  | FC      | 0.71     | 0.63  | 0.63  | 1.84 | 0.73 | 1.01 | 0.91 | 1.41 | 0.88 | 0.84 | 0.69 | 0.82  | 1.39  | 1.04 | 0.76  | 0.42 | 1.02 | 0.76 | 1.06  |
|             | p-value | NS       | 0.00  | NS    | NS   | NS   | NS   | NS   | 0.00 | NS   | NS   | NS   | NS    | NS    | NS   | NS    | NS   | NS   | NS   | NS    |
|             | AUC     | -        | 0.71  | -     | -    | -    | -    | -    | 0.71 | -    | -    | -    | -     | -     | -    | -     | -    | -    | -    | -     |
| COPD-mo/HC  | FC      | 0.47     | 0.76  | 0.41  | 1.25 | 0.64 | 1.17 | 0.85 | 1.67 | 0.43 | 0.88 | 0.80 | 0.75  | 1.71  | 1.28 | 0.61  | 0.37 | 0.81 | 1.96 | 1.07  |
|             | p-value | NS       | NS    | NS    | NS   | NS   | NS   | NS   | 0.00 | 0.00 | NS   | NS   | NS    | NS    | NS   | NS    | NS   | NS   | NS   | NS    |
|             | AUC     | -        | -     | -     | -    | 0.72 | 0.72 | -    | 0.84 | 0.91 | -    | -    | -     | -     | -    | -     | -    | -    | -    | -     |
| COPD-s/HC   | FC      | 0.22     | 0.43  | 0.20  | 1.65 | 0.63 | 1.32 | 1.34 | 1.65 | 0.66 | 1.28 | 0.51 | 0.31  | 1.20  | 1.24 | 0.50  | 0.39 | 0.69 | 0.83 | 1.32  |
|             | p-value | NS       | NS    | NS    | NS   | NS   | NS   | NS   | 0.00 | NS   | NS   | NS   | NS    | NS    | NS   | NS    | NS   | NS   | NS   | NS    |
|             | AUC     | -        | -     | -     | -    | -    | -    | -    | 0.85 | -    | -    | -    | -     | -     | -    | -     | -    | -    | -    | -     |
| COPD-vs/ HC | FC      | 0.94     | 0.89  | 0.80  | 0.74 | 0.65 | 1.14 | 0.93 | 1.37 | 1.29 | 0.95 | 0.62 | 1.12  | 1.71  | 1.07 | 0.84  | 1.14 | 1.39 | 1.38 | 0.95  |
|             | p-value | NS       | NS    | NS    | NS   | NS   | NS   | NS   | NS   | NS   | NS   | NS   | NS    | 0.01  | NS   | NS    | 0.00 | NS   | 0.00 | NS    |
|             | AUC     | -        | -     | -     | -    | -    | -    | -    | -    | -    | -    | -    | -     | 0.71  | -    | -     | 0.73 | -    | 0.73 | -     |
| LC/COPD-LC  | FC      | 109.90   | 5.94  | 15.11 | 1.21 | 2.88 | 0.73 | 1.09 | 0.62 | 3.32 | 0.96 | 0.70 | 43.97 | 0.58  | 0.72 | 1.52  | 2.24 | 2.40 | 1.65 | 0.52  |
|             | p-value | 0.00     | 0.00  | 0.00  | NS   | NS   | 0.01 | NS   | 0.00 | 0.00 | NS   | NS   | 0.00  | 0.00  | 0.02 | 0.01  | NS   | NS   | NS   | 0.00  |
|             | AUC     | 0.94     | 1.00  | 0.85  | -    | -    | 0.75 | -    | 0.93 | 0.99 | -    | -    | 0.99  | 0.80  | 0.80 | 0.83  | 0.77 | -    | 0.71 | 0.87  |
| LC/COPD-mi  | FC      | 3.33     | 2.15  | 1.96  | 0.63 | 2.48 | 0.73 | 1.09 | 0.68 | 1.43 | 0.84 | 1.66 | 2.28  | 0.57  | 0.92 | 1.14  | 1.76 | 0.82 | 1.57 | 0.75  |
|             | p-value | 0.00     | 0.00  | 0.01  | NS   | NS   | 0.00 | NS   | 0.00 | 0.00 | NS   | NS   | 0.00  | 0.00  | NS   | NS    | NS   | NS   | NS   | NS    |
|             | AUC     | 0.87     | 0.97  | -     | -    | 0.85 | 0.73 | -    | -    | 0.78 | -    | -    | 0.86  | 0.74  | -    | -     | -    | -    | -    | -     |
| LC/COPD-mo  | FC      | 4.97     | 1.78  | 2.98  | 0.92 | 2.87 | 0.63 | 1.16 | 0.57 | 2.92 | 0.80 | 1.44 | 2.50  | 0.47  | 0.75 | 1.41  | 2.01 | 1.03 | 0.60 | 0.75  |
|             | p-value | 0.00     | 0.00  | NS    | NS   | NS   | 0.00 | NS   | 0.00 | 0.00 | NS   | NS   | 0.00  | 0.00  | NS   | NS    | NS   | NS   | NS   | NS    |
|             | AUC     | 0.89     | 0.88  | 0.70  | -    | -    | 0.82 | -    | 0.96 | 0.99 | -    | -    | 0.94  | 0.83  | 0.78 | 0.75  | -    | -    | -    | 0.76  |

**Table S2. Cont.**

[illegible]

**Table S3.** VIP values of the different partial least square discriminant analyses. HC: Healthy control; LC: lung cancer; COPD: chronic obstructively pulmonary disease; COPD-LC: patients who developed LC during the follow-up; COPD-vs: very severe COPD; COPD-s: severe COPD, COPD-mo: moderate COPD and COPD-mi: mild COPD. **Bold numbers** indicate significant VIP values greater than 1.

| Elements | LC and HC   | COPD and LC | COPD-LC and COPD | COPD-mi and HC | COPD-s and HC | COPD-mo and HC | COPD-vs and HC | COPD-mi and COPD-vs |
|----------|-------------|-------------|------------------|----------------|---------------|----------------|----------------|---------------------|
| Al       | <b>2.06</b> | <b>1.89</b> | <b>1.58</b>      | 0.69           | <b>1.48</b>   | <b>1.26</b>    | 0.31           | <b>1.21</b>         |
| As       | <b>1.23</b> | <b>1.60</b> | <b>1.28</b>      | <b>1.24</b>    | <b>1.13</b>   | 0.94           | 0.26           | <b>1.44</b>         |
| Cd       | 0.87        | 0.91        | 0.93             | <b>2.04</b>    | <b>1.12</b>   | <b>1.04</b>    | 0.83           | <b>1.37</b>         |
| Co       | 0.58        | 0.16        | 0.67             | 0.70           | 0.65          | 0.29           | <b>1.42</b>    | <b>1.13</b>         |
| Cr       | 0.82        | 0.67        | 0.39             | 0.56           | 0.51          | 0.53           | <b>1.11</b>    | 0.51                |
| Cu       | 0.90        | <b>1.16</b> | 0.30             | 0.66           | <b>1.26</b>   | <b>1.05</b>    | <b>1.51</b>    | 0.67                |
| Fe       | 0.55        | 0.49        | 0.24             | 0.49           | 0.86          | 0.95           | 0.29           | 0.45                |
| Mg       | 0.62        | <b>1.29</b> | 0.39             | <b>1.16</b>    | <b>1.25</b>   | <b>1.43</b>    | 0.76           | 0.83                |
| Mn       | <b>1.06</b> | 0.78        | 0.72             | <b>1.27</b>    | 0.93          | <b>1.68</b>    | <b>1.04</b>    | 0.87                |
| Mo       | 0.51        | 0.47        | 0.20             | 0.73           | 0.35          | 0.48           | 0.50           | 0.33                |
| Ni       | 0.80        | 0.86        | <b>2.64</b>      | 0.80           | <b>1.05</b>   | 0.39           | 0.95           | 0.56                |
| Pb       | <b>2.06</b> | <b>1.60</b> | <b>1.17</b>      | 0.58           | <b>1.14</b>   | <b>1.24</b>    | 0.61           | <b>1.01</b>         |
| Sb       | 0.96        | <b>1.31</b> | 0.90             | 0.63           | 0.58          | <b>1.19</b>    | <b>1.54</b>    | 0.85                |
| Se       | 0.87        | 0.81        | 0.72             | <b>1.03</b>    | 0.70          | 0.78           | 0.94           | 0.57                |
| Tl       | 0.28        | 0.60        | 0.68             | 0.98           | <b>1.21</b>   | 0.73           | <b>1.18</b>    | 0.40                |
| U        | 0.27        | 0.41        | 0.56             | <b>1.22</b>    | <b>1.07</b>   | <b>1.12</b>    | <b>1.50</b>    | <b>2.00</b>         |
| V        | 0.71        | 0.39        | 0.92             | 0.64           | 0.50          | 0.79           | 0.30           | 0.52                |
| W        | 0.79        | 0.25        | 0.39             | <b>1.44</b>    | <b>1.20</b>   | 0.95           | <b>1.09</b>    | <b>1.23</b>         |
| Zn       | 0.87        | <b>1.04</b> | <b>1.04</b>      | 0.70           | <b>1.09</b>   | 0.96           | <b>1.09</b>    | <b>1.22</b>         |

**Table S4.** Elemental ratios fold changes of different groups versus HC. Significant p-values are shown in red color. NS: Non-significant. HC: Healthy control; LC: lung cancer; COPD: chronic obstructively pulmonary disease; COPD-LC: patients who developed LC during the follow-up; COPD-vs: very severe COPD; COPD-s: severe COPD, COPD-mo: moderate COPD and COPD-mi: mild COPD.

| Ratios | LC/HC   |      | COPD/HC |      | LC/COPD |      | COPD-LC /HC |      | COPD-mo/HC |    | COPD-se/HC |    | COPD-vs/HC |      |
|--------|---------|------|---------|------|---------|------|-------------|------|------------|----|------------|----|------------|------|
|        | FC      | p    | FC      | p    | FC      | p    | FC          | p    | FC         | p  | FC         | p  | FC         | p    |
| Al/As  | 2.27    | 0.00 | 1.05    | NS   | 2.16    | 0.00 | 0.25        | NS   | 0.72       | NS | 0.44       | NS | 1.30       | NS   |
| Al/Co  | 4.28    | 0.00 | 0.97    | NS   | 4.41    | 0.00 | 0.04        | 0.00 | 0.58       | NS | 0.65       | NS | 1.78       | NS   |
| Al/Cr  | 2.53    | 0.00 | 0.91    | NS   | 2.77    | 0.00 | 0.04        | 0.00 | 0.77       | NS | 0.34       | NS | 1.47       | NS   |
| Al/Cu  | 4.20    | 0.00 | 0.66    | NS   | 6.36    | 0.00 | 0.02        | 0.00 | 0.45       | NS | 0.21       | NS | 1.05       | NS   |
| Al/Fe  | 2.50    | 0.00 | 0.73    | NS   | 3.43    | 0.00 | 0.02        | NS   | 0.49       | NS | 0.15       | NS | 1.31       | NS   |
| Al/Mg  | 3.96    | 0.00 | 0.66    | NS   | 6.03    | 0.00 | 0.02        | 0.01 | 0.43       | NS | 0.23       | NS | 1.10       | NS   |
| Al/Mn  | 2.54    | 0.00 | 1.15    | NS   | 2.21    | 0.00 | 0.10        | 0.00 | 1.84       | NS | 0.43       | NS | 1.56       | NS   |
| Al/Mo  | 3.79    | 0.00 | 0.85    | NS   | 4.44    | 0.00 | 0.05        | 0.01 | 0.62       | NS | 0.23       | NS | 1.55       | NS   |
| Al/Ni  | 2.78    | 0.01 | 1.17    | NS   | 2.37    | 0.00 | 0.02        | 0.00 | 0.79       | NS | 0.46       | NS | 1.96       | 0.00 |
| Al/Pb  | 1.77    | 0.00 | 1.16    | NS   | 1.53    | 0.01 | 0.00        | 0.00 | 0.50       | NS | 1.34       | NS | 1.68       | 0.00 |
| Al/Sb  | 5.60    | 0.00 | 0.71    | NS   | 7.91    | 0.00 | 0.03        | 0.01 | 0.41       | NS | 0.17       | NS | 1.11       | NS   |
| Al/Se  | 4.15    | 0.00 | 0.87    | NS   | 4.77    | 0.00 | 0.02        | 0.00 | 0.61       | NS | 0.35       | NS | 1.41       | NS   |
| Al/Tl  | 2.26    | 0.00 | 0.69    | NS   | 3.26    | 0.00 | 0.04        | 0.00 | 0.49       | NS | 0.38       | NS | 0.96       | NS   |
| Al/U   | 2.07    | 0.00 | 0.61    | NS   | 3.40    | 0.00 | 0.02        | 0.00 | 0.88       | NS | 0.28       | NS | 0.56       | NS   |
| Al/V   | 4454.28 | NS   | 1.46    | NS   | 3051.94 | NS   | 0.02        | NS   | 0.87       | NS | 0.24       | NS | 1.42       | NS   |
| Al/W   | 1.68    | NS   | 0.68    | NS   | 2.47    | 0.00 | 0.02        | 0.00 | 0.89       | NS | 0.43       | NS | 0.68       | NS   |
| Al/Zn  | 4.31    | 0.00 | 0.83    | NS   | 5.22    | 0.00 | 0.02        | 0.00 | 0.65       | NS | 0.28       | NS | 1.40       | NS   |
| As/Co  | 1.91    | NS   | 0.88    | NS   | 2.17    | 0.00 | 0.40        | NS   | 0.77       | NS | 0.89       | NS | 1.42       | NS   |
| As/Cr  | 0.97    | NS   | 0.65    | NS   | 1.50    | 0.00 | 0.25        | NS   | 0.75       | NS | 0.44       | NS | 0.94       | NS   |
| As/Cu  | 2.11    | 0.00 | 0.60    | 0.00 | 3.50    | 0.00 | 0.23        | 0.00 | 0.59       | NS | 0.34       | NS | 0.87       | NS   |
| As/Fe  | 1.60    | NS   | 0.72    | NS   | 2.20    | 0.00 | 0.21        | 0.01 | 0.69       | NS | 0.32       | NS | 1.19       | NS   |
| As/Mg  | 0.65    | NS   | 0.17    | NS   | 3.78    | 0.00 | 0.05        | NS   | 0.18       | NS | 0.10       | NS | 0.26       | NS   |
| As/Mn  | 1.05    | NS   | 0.99    | NS   | 1.06    | NS   | 0.57        | NS   | 2.04       | NS | 0.72       | NS | 1.17       | NS   |
| As/Mo  | 1.85    | NS   | 1.09    | NS   | 1.70    | 0.01 | 0.59        | NS   | 1.05       | NS | 1.20       | NS | 1.72       | NS   |
| As/Ni  | 1.89    | NS   | 1.19    | NS   | 1.59    | NS   | 0.20        | 0.00 | 1.29       | NS | 0.95       | NS | 1.81       | 0.00 |
| As/Sb  | 2.67    | 0.00 | 0.69    | NS   | 3.85    | 0.00 | 0.30        | NS   | 0.56       | NS | 0.37       | NS | 1.00       | NS   |
| As/Se  | 1.59    | 0.00 | 0.66    | NS   | 2.42    | 0.00 | 0.19        | 0.00 | 0.62       | NS | 0.44       | NS | 0.99       | NS   |
| As/Tl  | 1.02    | NS   | 0.59    | NS   | 1.73    | 0.00 | 0.28        | 0.00 | 0.67       | NS | 0.52       | NS | 0.74       | NS   |
| As/U   | 1.23    | NS   | 0.72    | NS   | 1.70    | 0.00 | 0.30        | NS   | 1.37       | NS | 0.56       | NS | 0.62       | NS   |
| As/V   | 299.67  | NS   | 0.13    | NS   | 2247.86 | NS   | 0.02        | NS   | 0.11       | NS | 0.03       | NS | 0.13       | NS   |
| As/W   | 1.14    | NS   | 0.80    | NS   | 1.43    | NS   | 0.23        | 0.00 | 1.55       | NS | 0.65       | NS | 0.75       | NS   |
| As/Zn  | 1.95    | 0.00 | 0.71    | NS   | 2.76    | 0.00 | 0.16        | 0.00 | 0.83       | NS | 0.42       | NS | 1.11       | NS   |
| Cd/Co  | 2.05    | NS   | 0.06    | NS   | 0.60    | 0.00 | 0.14        | 0.01 | 0.38       | NS | 0.28       | NS | 1.16       | NS   |
| Cd/Cr  | 1.16    | NS   | 0.67    | NS   | 1.73    | NS   | 0.11        | 0.01 | 0.53       | NS | 0.27       | NS | 1.03       | NS   |
| Cd/Cu  | 0.54    | NS   | 0.12    | NS   | 4.63    | 0.00 | 0.03        | NS   | 0.08       | NS | 0.03       | NS | 0.17       | NS   |
| Cd/Fe  | 0.59    | NS   | 0.23    | NS   | 2.52    | 0.00 | 0.03        | NS   | 0.17       | NS | 0.06       | NS | 0.42       | NS   |
| Cd/Mg  | 0.23    | NS   | 0.04    | NS   | 5.16    | 0.00 | 0.01        | NS   | 0.03       | NS | 0.01       | NS | 0.07       | NS   |

Table S4. *Cont.*

| Ratios | LC/HC   |      | COPD/HC |      | LC/COPD |      | COPD-LC /HC |      | COPD-mo/HC |      | COPD-se/HC |      | COPD-vs/HC |      |
|--------|---------|------|---------|------|---------|------|-------------|------|------------|------|------------|------|------------|------|
|        | FC      | p    | FC      | p    | FC      | p    | FC          | p    | FC         | p    | FC         | p    | FC         | p    |
| Cd/Pb  | 0.48    | NS   | 0.88    | NS   | 0.54    | NS   | 0.00        | NS   | 0.16       | NS   | 0.42       | NS   | 0.60       | NS   |
| Cd/Sb  | 1.98    | NS   | 0.42    | NS   | 4.69    | 0.00 | 0.09        | NS   | 0.21       | NS   | 0.10       | NS   | 0.63       | NS   |
| Cd/Mo  | 1.56    | NS   | 0.74    | NS   | 2.12    | 0.00 | 0.31        | NS   | 0.55       | NS   | 0.18       | NS   | 1.35       | NS   |
| Cd/Ni  | 1.25    | NS   | 0.83    | NS   | 1.51    | NS   | 0.07        | NS   | 0.61       | NS   | 0.37       | NS   | 1.39       | NS   |
| Cd/Se  | 1.42    | NS   | 0.58    | NS   | 2.44    | 0.00 | 0.07        | 0.01 | 0.41       | NS   | 0.21       | NS   | 0.91       | NS   |
| Cd/Tl  | 1.25    | NS   | 0.57    | NS   | 2.19    | 0.00 | 0.13        | 0.00 | 0.45       | NS   | 0.37       | NS   | 0.76       | NS   |
| Cd/U   | 1.04    | NS   | 0.41    | NS   | 2.51    | 0.00 | 0.09        | NS   | 0.65       | NS   | 0.19       | NS   | 0.37       | NS   |
| Cd/V   | 4126.23 | NS   | 0.81    | NS   | 5081.50 | NS   | 0.01        | NS   | 0.56       | NS   | 0.12       | NS   | 0.77       | NS   |
| Cd/W   | 1.45    | NS   | 0.50    | 0.00 | 2.88    | 0.01 | 0.08        | 0.01 | 0.83       | NS   | 0.28       | NS   | 0.55       | NS   |
| Cd/Zn  | 1.40    | NS   | 0.38    | NS   | 3.65    | 0.00 | 0.05        | NS   | 0.32       | NS   | 0.10       | NS   | 0.63       | NS   |
| Co/Cr  | 0.62    | NS   | 0.85    | NS   | 0.72    | NS   | 0.86        | NS   | 0.96       | NS   | 1.26       | NS   | 0.57       | NS   |
| Co/Cu  | 0.33    | NS   | 0.27    | NS   | 1.21    | NS   | 0.20        | NS   | 0.25       | NS   | 0.30       | NS   | 0.13       | NS   |
| Co/Mn  | 0.69    | NS   | 2.02    | NS   | 0.34    | NS   | 2.54        | 0.00 | 3.19       | NS   | 1.89       | NS   | 0.73       | NS   |
| Co/Pb  | 1.41    | NS   | 0.15    | NS   | 9.25    | NS   | 0.00        | NS   | 0.05       | NS   | 0.58       | NS   | 0.05       | NS   |
| Co/Sb  | 1.30    | NS   | 1.00    | NS   | 1.29    | NS   | 1.05        | NS   | 0.64       | NS   | 0.32       | NS   | 0.66       | NS   |
| Co/Tl  | 1.18    | NS   | 1.22    | NS   | 0.97    | NS   | 1.48        | NS   | 1.34       | NS   | 1.77       | NS   | 0.53       | NS   |
| Co/U   | 0.75    | NS   | 1.43    | NS   | 0.52    | NS   | 1.22        | NS   | 1.65       | NS   | 1.67       | NS   | 0.41       | NS   |
| Co/W   | 0.79    | NS   | 1.31    | NS   | 0.60    | NS   | 0.95        | NS   | 1.39       | NS   | 1.12       | NS   | 0.49       | NS   |
| Cr/Mn  | 1.31    | NS   | 1.42    | NS   | 0.92    | NS   | 2.64        | 0.00 | 2.01       | NS   | 1.32       | NS   | 0.89       | NS   |
| Cr/Ni  | 1.24    | NS   | 1.12    | NS   | 1.11    | NS   | 0.51        | NS   | 1.03       | NS   | 1.38       | NS   | 1.20       | NS   |
| Cr/Sb  | 2.44    | 0.00 | 0.80    | NS   | 3.03    | 0.00 | 1.03        | NS   | 0.56       | NS   | 0.44       | NS   | 0.72       | NS   |
| Cr/U   | 1.48    | NS   | 0.94    | NS   | 1.58    | NS   | 1.00        | NS   | 1.16       | NS   | 0.93       | NS   | 0.57       | NS   |
| Cu/Fe  | 0.79    | NS   | 1.19    | NS   | 0.67    | 0.00 | 1.08        | NS   | 1.34       | NS   | 1.14       | NS   | 1.38       | NS   |
| Cu/Mg  | 0.17    | NS   | 0.18    | NS   | 0.94    | NS   | 0.14        | NS   | 0.15       | NS   | 0.17       | NS   | 0.18       | NS   |
| Cu/Mn  | 0.47    | 0.00 | 1.77    | NS   | 0.26    | 0.00 | 3.20        | 0.00 | 2.71       | 0.00 | 2.29       | NS   | 1.28       | NS   |
| Cu/Mo  | 1.00    | NS   | 1.92    | NS   | 0.52    | NS   | 3.36        | NS   | 1.45       | NS   | 2.38       | NS   | 2.03       | 0.00 |
| Cu/Ni  | 0.82    | NS   | 1.59    | 0.00 | 0.52    | 0.01 | 0.69        | NS   | 1.52       | NS   | 2.33       | 0.00 | 1.83       | 0.00 |
| Cu/Pb  | 0.16    | NS   | 0.15    | NS   | 1.04    | NS   | 0.00        | NS   | 0.06       | NS   | 0.70       | NS   | 0.06       | NS   |
| Cu/Se  | 0.77    | NS   | 0.90    | NS   | 0.85    | NS   | 0.76        | NS   | 0.87       | NS   | 1.03       | NS   | 1.00       | NS   |
| Cu/Tl  | 0.49    | 0.00 | 0.94    | NS   | 0.52    | 0.00 | 0.99        | NS   | 1.12       | NS   | 1.42       | NS   | 0.81       | NS   |
| Cu/U   | 0.72    | NS   | 1.34    | NS   | 0.54    | 0.00 | 1.48        | NS   | 1.90       | NS   | 1.66       | NS   | 0.86       | NS   |
| Cu/W   | 0.71    | NS   | 1.29    | NS   | 0.55    | 0.00 | 1.09        | NS   | 1.72       | NS   | 1.49       | NS   | 1.00       | NS   |
| Cu/Zn  | 0.95    | NS   | 1.03    | NS   | 0.92    | NS   | 0.76        | NS   | 1.13       | NS   | 1.08       | NS   | 1.24       | NS   |
| Fe/Mn  | 0.70    | NS   | 1.55    | NS   | 0.45    | 0.00 | 2.91        | 0.00 | 2.11       | NS   | 1.69       | NS   | 1.13       | NS   |
| Fe/Ni  | 1.24    | NS   | 1.32    | NS   | 0.94    | NS   | 0.65        | NS   | 1.05       | NS   | 2.28       | 0.00 | 1.42       | NS   |
| Fe/Sb  | 1.80    | 0.00 | 0.95    | NS   | 1.90    | 0.00 | 1.34        | NS   | 0.62       | NS   | 0.68       | NS   | 0.87       | NS   |
| Fe/U   | 1.13    | NS   | 1.32    | NS   | 0.85    | NS   | 1.49        | NS   | 1.61       | NS   | 1.86       | NS   | 0.85       | NS   |
| Fe/Zn  | 1.48    | 0.01 | 0.93    | NS   | 1.59    | 0.00 | 0.73        | NS   | 0.87       | NS   | 1.11       | NS   | 1.06       | NS   |
| Mg/Mn  | 0.61    | 0.00 | 2.38    | 0.00 | 0.25    | 0.00 | 4.90        | 0.00 | 3.84       | 0.00 | 2.53       | 0.00 | 1.52       | NS   |



Table S4. Cont.

| Ratios | LC/HC   |      | COPD/HC |      | LC/COPD |      | COPD-LC /HC |      | COPD-mo/HC |      | COPD-se/HC |      | COPD-vs/HC |      |
|--------|---------|------|---------|------|---------|------|-------------|------|------------|------|------------|------|------------|------|
|        | FC      | p    | FC      | p    | FC      | p    | FC          | p    | FC         | p    | FC         | p    | FC         | p    |
| Mg/Mo  | 1.06    | NS   | 1.86    | NS   | 0.57    | NS   | 3.31        | 0.01 | 1.50       | NS   | 2.16       | NS   | 1.81       | NS   |
| Mg/Ni  | 0.85    | NS   | 1.55    | 0.00 | 0.55    | 0.01 | 0.79        | NS   | 1.58       | NS   | 2.17       | 0.00 | 1.62       | 0.00 |
| Mg/Pb  | 0.73    | NS   | 1.39    | NS   | 0.53    | NS   | 0.05        | NS   | 0.70       | NS   | 5.37       | NS   | 0.50       | NS   |
| Mg/Tl  | 0.70    | 0.01 | 1.45    | 0.00 | 0.48    | 0.00 | 1.82        | 0.00 | 1.84       | 0.00 | 1.98       | 0.00 | 1.10       | NS   |
| Mg/U   | 0.72    | NS   | 1.39    | NS   | 0.52    | 0.00 | 1.71        | 0.00 | 2.01       | 0.00 | 1.57       | NS   | 0.81       | NS   |
| Mg/W   | 0.64    | NS   | 1.28    | NS   | 0.50    | 0.00 | 1.25        | NS   | 1.71       | NS   | 1.36       | NS   | 0.91       | NS   |
| Mg/Zn  | 1.23    | NS   | 1.31    | 0.00 | 0.94    | NS   | 1.11        | NS   | 1.55       | NS   | 1.27       | NS   | 1.44       | 0.00 |
| Mn/Ni  | 1.53    | NS   | 1.25    | NS   | 1.22    | NS   | 0.27        | 0.00 | 0.59       | NS   | 1.21       | NS   | 1.85       | 0.00 |
| Mn/Pb  | 0.75    | NS   | 0.18    | NS   | 4.17    | NS   | 0.01        | NS   | 0.04       | NS   | 0.44       | NS   | 0.12       | NS   |
| Mn/Sb  | 2.14    | 0.00 | 0.81    | NS   | 2.64    | 0.00 | 0.46        | NS   | 0.35       | NS   | 0.35       | NS   | 1.10       | NS   |
| Mn/Se  | 1.46    | 0.00 | 0.86    | NS   | 1.69    | 0.00 | 0.31        | 0.00 | 0.35       | 0.00 | 0.57       | NS   | 1.54       | NS   |
| Mn/Tl  | 1.08    | NS   | 0.84    | NS   | 1.28    | NS   | 0.54        | NS   | 0.47       | NS   | 0.82       | NS   | 1.15       | NS   |
| Mn/U   | 1.06    | NS   | 0.81    | NS   | 1.31    | NS   | 0.50        | NS   | 0.61       | NS   | 0.76       | NS   | 0.88       | NS   |
| Mn/Zn  | 0.50    | NS   | 0.28    | NS   | 1.81    | 0.00 | 0.07        | 0.00 | 0.12       | NS   | 0.15       | NS   | 0.53       | NS   |
| Mo/Ni  | 1.00    | NS   | 1.29    | NS   | 0.78    | NS   | 0.49        | NS   | 0.99       | NS   | 2.20       | NS   | 1.50       | NS   |
| Mo/Pb  | 0.25    | NS   | 3.35    | NS   | 0.08    | NS   | 0.00        | NS   | 1.79       | NS   | 19.80      | NS   | 0.75       | NS   |
| Mo/Tl  | 0.56    | NS   | 0.92    | NS   | 0.61    | 0.01 | 0.99        | NS   | 1.12       | NS   | 1.63       | NS   | 0.68       | NS   |
| Mo/U   | 0.61    | NS   | 0.84    | NS   | 0.73    | NS   | 0.86        | NS   | 1.04       | NS   | 1.21       | NS   | 0.56       | NS   |
| Ni/Mo  | 1.98    | NS   | 1.59    | NS   | 1.24    | NS   | 4.15        | 0.00 | 1.05       | NS   | 1.03       | NS   | 1.43       | NS   |
| Ni/Sb  | 2.81    | 0.00 | 1.09    | NS   | 2.57    | 0.00 | 2.54        | 0.00 | 1.01       | NS   | 0.42       | NS   | 0.80       | NS   |
| Ni/Se  | 1.73    | 0.01 | 0.96    | NS   | 1.80    | 0.00 | 1.49        | NS   | 0.92       | NS   | 0.63       | NS   | 0.97       | NS   |
| Ni/Tl  | 1.15    | NS   | 1.19    | NS   | 0.96    | NS   | 2.51        | 0.00 | 1.53       | NS   | 0.98       | NS   | 0.84       | NS   |
| Ni/U   | 1.31    | NS   | 1.18    | NS   | 1.11    | NS   | 2.41        | 0.00 | 1.50       | NS   | 0.82       | NS   | 0.61       | NS   |
| Ni/W   | 0.65    | NS   | 1.04    | NS   | 0.63    | 0.00 | 1.67        | NS   | 1.26       | NS   | 0.70       | NS   | 0.66       | NS   |
| Ni/Zn  | 0.55    | NS   | 0.72    | NS   | 0.76    | NS   | 0.34        | NS   | 0.26       | NS   | 0.15       | NS   | 0.28       | NS   |
| Pb/Ni  | 3.11    | NS   | 1.39    | NS   | 2.23    | NS   | 0.04        | 0.00 | 1.25       | NS   | 0.75       | NS   | 2.43       | 0.00 |
| Pb/Sb  | 4.14    | 0.00 | 0.72    | NS   | 5.78    | 0.00 | 0.07        | NS   | 0.60       | NS   | 0.15       | NS   | 1.08       | NS   |
| Pb/Se  | 3.03    | 0.00 | 1.08    | NS   | 2.81    | 0.00 | 0.04        | 0.00 | 0.90       | NS   | 0.43       | NS   | 1.95       | NS   |
| Pb/Tl  | 1.89    | 0.00 | 0.77    | NS   | 2.45    | 0.00 | 0.10        | 0.00 | 0.75       | NS   | 0.53       | NS   | 1.06       | NS   |
| Pb/U   | 1.55    | NS   | 0.68    | NS   | 2.29    | 0.00 | 0.06        | NS   | 1.27       | NS   | 0.36       | NS   | 0.59       | NS   |
| Pb/V   | 3416.23 | NS   | 1.50    | NS   | 2282.75 | NS   | 0.00        | 0.00 | 1.23       | NS   | 0.71       | NS   | 1.60       | NS   |
| Pb/W   | 1.62    | NS   | 0.81    | NS   | 2.01    | 0.01 | 0.06        | 0.00 | 1.45       | NS   | 0.49       | NS   | 0.77       | NS   |
| Pb/Zn  | 2.21    | 0.00 | 0.68    | NS   | 3.24    | 0.00 | 0.03        | NS   | 0.65       | NS   | 0.22       | NS   | 1.28       | NS   |
| Sb/Ni  | 0.74    | NS   | 1.52    | 0.00 | 0.49    | 0.01 | 0.68        | NS   | 1.67       | NS   | 1.52       | NS   | 1.97       | 0.00 |
| Sb/Pb  | 0.22    | NS   | 2.44    | NS   | 0.09    | NS   | 0.10        | NS   | 1.11       | NS   | 8.90       | NS   | 1.31       | NS   |
| Sb/Se  | 0.90    | NS   | 1.36    | NS   | 0.66    | 0.00 | 1.04        | NS   | 1.33       | NS   | 1.12       | NS   | 1.79       | 0.00 |
| Sb/Tl  | 0.55    | 0.00 | 1.28    | NS   | 0.43    | 0.00 | 1.47        | NS   | 1.56       | NS   | 1.37       | NS   | 1.25       | NS   |
| Sb/U   | 0.57    | 0.01 | 1.22    | NS   | 0.46    | 0.00 | 1.23        | NS   | 1.95       | NS   | 1.06       | NS   | 0.88       | NS   |
| Sb/W   | 0.54    | NS   | 1.15    | NS   | 0.47    | 0.00 | 0.87        | NS   | 1.84       | NS   | 1.15       | NS   | 0.95       | NS   |

**Table S4.** *Cont.*

| Ratios       | LC/HC  |      | COPD/HC |    | LC/COPD |      | COPD-LC /HC |      | COPD-mo/HC |    | COPD-se/HC |    | COPD-vs/HC |      |
|--------------|--------|------|---------|----|---------|------|-------------|------|------------|----|------------|----|------------|------|
|              | FC     | p    | FC      | p  | FC      | p    | FC          | p    | FC         | p  | FC         | p  | FC         | p    |
| <b>Sb/Zn</b> | 1.02   | NS   | 1.37    | NS | 0.74    | NS   | 0.82        | NS   | 1.58       | NS | 1.04       | NS | 1.97       | 0.00 |
| <b>Se/Tl</b> | 0.73   | 0.00 | 1.11    | NS | 0.66    | 0.00 | 1.57        | 0.00 | 1.42       | NS | 1.48       | NS | 0.85       | NS   |
| <b>Se/U</b>  | 0.78   | NS   | 1.13    | NS | 0.69    | 0.00 | 1.53        | NS   | 1.65       | NS | 1.26       | NS | 0.66       | NS   |
| <b>Se/W</b>  | 0.89   | NS   | 1.06    | NS | 0.84    | NS   | 1.18        | NS   | 1.50       | NS | 1.06       | NS | 0.76       | NS   |
| <b>Tl/U</b>  | 1.08   | NS   | 1.12    | NS | 0.96    | NS   | 1.12        | NS   | 1.56       | NS | 0.90       | NS | 0.75       | NS   |
| <b>Tl/Zn</b> | 0.11   | NS   | 0.21    | NS | 0.54    | NS   | 0.04        | NS   | 0.06       | NS | 0.04       | NS | 0.09       | NS   |
| <b>U/V</b>   | 156.93 | NS   | 0.22    | NS | 701.65  | NS   | 0.07        | NS   | 0.31       | NS | 0.09       | NS | 0.31       | NS   |
| <b>U/W</b>   | 1.32   | NS   | 1.31    | NS | 1.01    | NS   | 0.92        | NS   | 1.01       | NS | 1.07       | NS | 1.56       | 0.00 |
| <b>W/Zn</b>  | 2.25   | 0.01 | 1.74    | NS | 1.30    | NS   | 0.63        | NS   | 1.80       | NS | 0.79       | NS | 1.66       | NS   |

**Table S5.** Elemental ratios fold changes of different groups versus LC. Significant p-values are shown in red color. NS: Non-significant. HC: Healthy control; LC: lung cancer; COPD: chronic obstructively pulmonary disease; COPD-LC: patients who developed LC during the follow-up; COPD-vs: very severe COPD; COPD-s: severe COPD, COPD-mo: moderate COPD and COPD-mi: mild COPD.

| Ratios | LC/ COPD-LC |      | LC/COPD-mi |      | LC/COPD-mi |      | LC/COPD-s |      | LC/COPD-vs |      |
|--------|-------------|------|------------|------|------------|------|-----------|------|------------|------|
|        | FC          | p    | FC         | p    | FC         | p    | FC        | p    | FC         | p    |
| Al/As  | 9.26        | 0.00 | 1.58       | NS   | 3.17       | 0.00 | 5.11      | 0.00 | 1.75       | 0.00 |
| Al/Co  | 107.38      | 0.00 | 4.39       | 0.00 | 7.37       | NS   | 6.60      | NS   | 2.41       | NS   |
| Al/Cr  | 71.28       | 0.00 | 2.35       | 0.00 | 3.30       | 0.00 | 7.46      | 0.00 | 1.72       | 0.00 |
| Al/Cu  | 168.24      | 0.00 | 5.14       | 0.00 | 9.41       | 0.00 | 19.99     | 0.00 | 3.99       | 0.00 |
| Al/Fe  | 110.10      | 0.00 | 3.01       | 0.00 | 5.07       | 0.01 | 16.75     | 0.00 | 1.90       | NS   |
| Al/Mg  | 171.68      | 0.00 | 5.12       | 0.00 | 9.25       | 0.01 | 17.41     | 0.00 | 3.59       | 0.00 |
| Al/Mn  | 24.63       | 0.00 | 1.96       | 0.00 | 1.38       | NS   | 5.96      | 0.00 | 1.63       | NS   |
| Al/Mo  | 73.77       | 0.00 | 4.07       | 0.00 | 6.14       | NS   | 16.59     | 0.01 | 2.45       | NS   |
| Al/Ni  | 135.07      | NS   | 2.02       | NS   | 3.52       | NS   | 6.03      | NS   | 1.42       | NS   |
| Al/Pb  | 0.00        | 0.00 | 1.31       | NS   | 3.54       | 0.00 | 1.33      | NS   | 1.05       | NS   |
| Al/Sb  | 178.78      | 0.00 | 6.08       | 0.00 | 13.78      | 0.00 | 33.60     | 0.00 | 5.06       | 0.00 |
| Al/Se  | 177.10      | 0.00 | 4.00       | 0.00 | 6.85       | 0.00 | 11.72     | 0.00 | 2.94       | 0.00 |
| Al/Tl  | 62.01       | 0.00 | 2.53       | 0.00 | 4.63       | 0.00 | 5.93      | 0.00 | 2.34       | 0.00 |
| Al/U   | 87.00       | 0.00 | 2.36       | 0.00 | 2.34       | 0.01 | 7.29      | 0.00 | 3.73       | 0.00 |
| Al/W   | 84.18       | 0.00 | 1.80       | NS   | 1.89       | NS   | 3.93      | NS   | 2.46       | 0.01 |
| Al/Zn  | 200.75      | 0.00 | 4.56       | 0.00 | 6.67       | 0.00 | 15.36     | 0.00 | 3.08       | 0.00 |
| As/Co  | 4.81        | NS   | 2.60       | 0.00 | 2.49       | NS   | 2.15      | NS   | 1.35       | NS   |
| As/Cr  | 3.92        | 0.00 | 1.51       | 0.00 | 1.30       | NS   | 2.22      | 0.00 | 1.03       | NS   |
| As/Cu  | 9.17        | 0.00 | 3.30       | 0.00 | 3.54       | 0.00 | 6.20      | 0.00 | 2.42       | 0.00 |
| As/Fe  | 7.46        | 0.00 | 2.18       | 0.00 | 2.31       | NS   | 4.96      | 0.01 | 1.34       | NS   |
| As/Mg  | 11.90       | 0.00 | 3.75       | 0.00 | 3.61       | NS   | 6.23      | 0.01 | 2.48       | 0.00 |
| As/Mn  | 1.84        | 0.00 | 1.24       | NS   | 0.51       | 0.01 | 1.46      | NS   | 0.89       | NS   |
| As/Mo  | 3.14        | NS   | 2.19       | 0.00 | 1.77       | NS   | 1.55      | NS   | 1.08       | NS   |
| As/Ni  | 9.61        | NS   | 1.58       | NS   | 1.47       | NS   | 1.99      | NS   | 1.04       | NS   |
| As/Sb  | 8.76        | 0.00 | 3.51       | 0.00 | 4.77       | 0.00 | 7.12      | 0.00 | 2.68       | 0.00 |
| As/Se  | 8.24        | 0.00 | 2.33       | 0.00 | 2.57       | 0.00 | 3.65      | 0.00 | 1.60       | 0.00 |
| As/Tl  | 3.65        | 0.00 | 1.67       | 0.00 | 1.52       | NS   | 1.97      | 0.00 | 1.38       | NS   |
| As/U   | 4.17        | 0.00 | 1.49       | NS   | 0.90       | NS   | 2.19      | NS   | 1.97       | 0.00 |
| As/W   | 4.89        | NS   | 1.27       | NS   | 0.74       | NS   | 1.76      | NS   | 1.53       | NS   |
| As/Zn  | 12.41       | 0.00 | 2.81       | 0.00 | 2.36       | NS   | 4.59      | 0.00 | 1.75       | 0.00 |
| Cd/Co  | 14.37       | NS   | 2.76       | NS   | 5.39       | NS   | 7.26      | NS   | 1.76       | NS   |
| Cd/Cr  | 10.35       | 0.01 | 1.47       | NS   | 2.19       | NS   | 4.23      | NS   | 1.13       | NS   |
| Cd/Cu  | 18.75       | NS   | 3.68       | NS   | 6.65       | NS   | 16.49     | NS   | 3.19       | NS   |
| Cd/Fe  | 18.36       | 0.01 | 2.32       | NS   | 3.54       | NS   | 9.68      | NS   | 1.42       | NS   |
| Cd/Mg  | 35.65       | NS   | 4.31       | NS   | 7.42       | NS   | 16.97     | NS   | 3.24       | NS   |
| Cd/Mo  | 5.05        | NS   | 2.23       | NS   | 2.82       | NS   | 8.60      | NS   | 1.16       | NS   |
| Cd/Ni  | 18.41       | NS   | 1.36       | NS   | 2.06       | NS   | 3.34      | NS   | 0.90       | NS   |

Table S5. *Cont.*

| Ratios | LC/ COPD-LC |      | LC/COPD-mi |      | LC/COPD-mi |      | LC/COPD-s |      | LC/COPD-vs |      |
|--------|-------------|------|------------|------|------------|------|-----------|------|------------|------|
|        | FC          | p    | FC         | p    | FC         | p    | FC        | p    | FC         | p    |
| Cd/Pb  | 0.00        | NS   | 0.28       | NS   | 2.95       | NS   | 1.14      | NS   | 0.80       | NS   |
| Cd/Sb  | 22.79       | 0.01 | 3.59       | 0.00 | 9.45       | NS   | 20.57     | NS   | 3.14       | 0.01 |
| Cd/Se  | 19.20       | 0.00 | 2.04       | 0.01 | 3.43       | NS   | 6.62      | 0.01 | 1.56       | NS   |
| Cd/Tl  | 9.88        | 0.00 | 1.80       | NS   | 2.80       | NS   | 3.37      | NS   | 1.64       | NS   |
| Cd/U   | 11.77       | 0.01 | 1.85       | NS   | 1.59       | NS   | 5.59      | NS   | 2.79       | NS   |
| Cd/W   | 17.14       | NS   | 2.38       | NS   | 1.75       | NS   | 5.19      | NS   | 2.64       | NS   |
| Cd/Zn  | 30.13       | NS   | 3.16       | NS   | 4.42       | NS   | 13.44     | NS   | 2.23       | NS   |
| Co/Cr  | 0.71        | NS   | 0.69       | NS   | 0.64       | NS   | 0.49      | 0.01 | 1.08       | NS   |
| Co/Cu  | 1.60        | NS   | 0.85       | NS   | 1.30       | NS   | 1.09      | NS   | 2.60       | 0.00 |
| Co/Mn  | 0.27        | 0.00 | 0.29       | NS   | 0.22       | 0.00 | 0.37      | 0.00 | 0.95       | NS   |
| Co/Pb  | 627.89      | NS   | 7.79       | NS   | 31.20      | NS   | 2.44      | NS   | 27.26      | NS   |
| Co/Sb  | 1.24        | NS   | 0.88       | NS   | 2.04       | 0.01 | 4.05      | 0.00 | 1.96       | 0.00 |
| Co/Tl  | 0.80        | NS   | 0.86       | NS   | 0.88       | NS   | 0.67      | NS   | 2.22       | NS   |
| Co/U   | 0.62        | NS   | 0.37       | NS   | 0.45       | 0.00 | 0.45      | 0.01 | 1.84       | 0.01 |
| Co/W   | 0.84        | NS   | 0.39       | NS   | 0.57       | NS   | 0.71      | NS   | 1.62       | NS   |
| Cr/Mn  | 0.50        | NS   | 1.09       | NS   | 0.65       | NS   | 0.99      | NS   | 1.47       | NS   |
| Cr/Ni  | 2.43        | NS   | 1.00       | NS   | 1.21       | NS   | 0.90      | NS   | 1.03       | NS   |
| Cr/Sb  | 2.36        | NS   | 2.61       | 0.00 | 4.36       | NS   | 5.56      | NS   | 3.38       | 0.00 |
| Cr/U   | 1.48        | NS   | 1.35       | NS   | 1.27       | NS   | 1.59      | NS   | 2.62       | NS   |
| Cu/Fe  | 0.73        | NS   | 0.74       | NS   | 0.59       | 0.01 | 0.70      | NS   | 0.58       | 0.00 |
| Cu/Mg  | 1.23        | NS   | 0.80       | NS   | 1.14       | NS   | 1.02      | NS   | 0.98       | NS   |
| Cu/Mn  | 0.15        | 0.00 | 0.39       | 0.00 | 0.17       | 0.00 | 0.20      | 0.00 | 0.37       | 0.00 |
| Cu/Mo  | 0.30        | NS   | 0.76       | NS   | 0.69       | NS   | 0.42      | NS   | 0.49       | 0.00 |
| Cu/Ni  | 1.19        | NS   | 0.52       | NS   | 0.54       | NS   | 0.35      | NS   | 0.45       | NS   |
| Cu/Pb  | 37.86       | NS   | 1.16       | NS   | 2.62       | NS   | 0.23      | NS   | 2.67       | NS   |
| Cu/Se  | 1.01        | NS   | 0.88       | NS   | 0.88       | NS   | 0.74      | NS   | 0.77       | 0.01 |
| Cu/Tl  | 0.49        | 0.00 | 0.58       | 0.00 | 0.44       | 0.00 | 0.35      | 0.00 | 0.61       | 0.00 |
| Cu/U   | 0.49        | 0.00 | 0.52       | 0.00 | 0.38       | 0.00 | 0.43      | 0.00 | 0.83       | NS   |
| Cu/W   | 0.65        | NS   | 0.51       | 0.00 | 0.41       | 0.01 | 0.47      | NS   | 0.71       | NS   |
| Cu/Zn  | 1.25        | NS   | 1.00       | NS   | 0.84       | NS   | 0.88      | NS   | 0.77       | 0.00 |
| Fe/Mn  | 0.24        | 0.00 | 0.61       | NS   | 0.33       | 0.00 | 0.42      | 0.00 | 0.62       | NS   |
| Fe/Ni  | 1.91        | NS   | 0.95       | NS   | 1.18       | NS   | 0.54      | NS   | 0.87       | NS   |
| Fe/Sb  | 1.34        | NS   | 1.78       | 0.01 | 2.93       | NS   | 2.64      | NS   | 2.07       | 0.00 |
| Fe/U   | 0.76        | NS   | 0.84       | NS   | 0.70       | NS   | 0.61      | NS   | 1.34       | NS   |
| Fe/Zn  | 2.04        | 0.01 | 1.68       | 0.00 | 1.70       | NS   | 1.34      | NS   | 1.39       | NS   |
| Mg/Mn  | 0.12        | 0.00 | 0.38       | 0.00 | 0.16       | 0.00 | 0.24      | 0.00 | 0.40       | 0.00 |
| Mg/Mo  | 0.32        | 0.01 | 0.77       | NS   | 0.71       | NS   | 0.49      | NS   | 0.59       | NS   |
| Mg/Ni  | 1.07        | NS   | 0.53       | NS   | 0.54       | NS   | 0.39      | NS   | 0.52       | NS   |
| Mg/Pb  | 13.89       | NS   | 0.48       | NS   | 1.04       | NS   | 0.14      | NS   | 1.45       | NS   |

Table S5. *Cont.*

| Ratios | LC/ COPD-LC |      | LC/COPD-mi |      | LC/COPD-mi |      | LC/COPD-s |      | LC/COPD-vs |      |
|--------|-------------|------|------------|------|------------|------|-----------|------|------------|------|
|        | FC          | p    | FC         | p    | FC         | p    | FC        | p    | FC         | p    |
| Mg/Tl  | 0.38        | 0.00 | 0.54       | 0.00 | 0.38       | 0.00 | 0.35      | 0.00 | 0.63       | 0.00 |
| Mg/U   | 0.42        | 0.00 | 0.50       | 0.00 | 0.36       | 0.00 | 0.46      | 0.00 | 0.90       | NS   |
| Mg/W   | 0.51        | 0.00 | 0.46       | 0.00 | 0.37       | 0.00 | 0.47      | 0.01 | 0.71       | NS   |
| Mg/Zn  | 1.11        | NS   | 0.98       | NS   | 0.80       | NS   | 0.97      | NS   | 0.85       | NS   |
| Mn/Ni  | 5.75        | NS   | 1.09       | NS   | 2.59       | NS   | 1.26      | NS   | 0.83       | NS   |
| Mn/Pb  | 82.63       | NS   | 3.04       | NS   | 20.62      | NS   | 1.72      | NS   | 6.37       | NS   |
| Mn/Sb  | 4.61        | 0.00 | 2.18       | 0.00 | 6.05       | 0.00 | 6.13      | 0.00 | 1.94       | 0.00 |
| Mn/Se  | 4.78        | 0.00 | 1.74       | 0.00 | 4.14       | 0.00 | 2.57      | 0.00 | 0.95       | NS   |
| Mn/Tl  | 1.98        | 0.01 | 1.27       | NS   | 2.29       | NS   | 1.32      | NS   | 0.94       | NS   |
| Mn/U   | 2.12        | 0.00 | 1.12       | NS   | 1.75       | NS   | 1.40      | NS   | 1.21       | NS   |
| Mn/Zn  | 6.95        | 0.00 | 1.91       | 0.00 | 4.23       | 0.00 | 3.25      | 0.00 | 0.95       | NS   |
| Mo/Ni  | 2.03        | NS   | 0.80       | NS   | 1.02       | NS   | 0.46      | NS   | 0.67       | NS   |
| Mo/Pb  | 0.00        | 0.00 | 0.12       | NS   | 0.14       | NS   | 0.01      | NS   | 0.34       | 0.00 |
| Mo/Tl  | 0.57        | NS   | 0.70       | NS   | 0.50       | NS   | 0.34      | 0.00 | 0.83       | NS   |
| Mo/U   | 0.72        | NS   | 0.71       | NS   | 0.59       | NS   | 0.51      | 0.01 | 1.10       | NS   |
| Ni/Mo  | 0.48        | NS   | 1.90       | NS   | 1.89       | NS   | 1.92      | NS   | 1.38       | NS   |
| Ni/Sb  | 1.11        | NS   | 2.94       | 0.00 | 2.79       | NS   | 6.75      | NS   | 3.51       | 0.00 |
| Ni/Se  | 1.16        | NS   | 1.99       | 0.00 | 1.87       | NS   | 2.76      | NS   | 1.78       | NS   |
| Ni/Tl  | 0.46        | 0.00 | 1.25       | NS   | 0.75       | NS   | 1.17      | NS   | 1.37       | NS   |
| Ni/U   | 0.54        | 0.00 | 1.18       | NS   | 0.88       | NS   | 1.60      | NS   | 2.15       | NS   |
| Ni/W   | 0.39        | 0.00 | 0.60       | 0.01 | 0.52       | 0.01 | 0.94      | NS   | 0.99       | NS   |
| Ni/Zn  | 1.60        | NS   | 0.39       | NS   | 2.15       | NS   | 3.77      | NS   | 1.98       | NS   |
| Pb/Ni  | 84.93       | NS   | 2.16       | NS   | 2.49       | NS   | 4.12      | NS   | 1.28       | NS   |
| Pb/Sb  | 61.71       | 0.00 | 4.57       | 0.00 | 6.90       | 0.00 | 27.41     | 0.00 | 3.84       | 0.00 |
| Pb/Se  | 70.50       | 0.00 | 2.71       | 0.00 | 3.37       | 0.00 | 7.08      | 0.00 | 1.55       | NS   |
| Pb/Tl  | 19.53       | 0.00 | 2.09       | 0.00 | 2.50       | 0.00 | 3.58      | 0.00 | 1.78       | 0.00 |
| Pb/U   | 27.44       | 0.00 | 1.72       | 0.00 | 1.22       | NS   | 4.29      | 0.00 | 2.64       | 0.00 |
| Pb/V   | 0.00        | NS   | 1515.31    | NS   | 2783.77    | NS   | 4842.67   | NS   | 2132.06    | NS   |
| Pb/W   | 27.91       | NS   | 1.57       | NS   | 1.12       | NS   | 3.29      | NS   | 2.12       | NS   |
| Pb/Zn  | 78.67       | 0.00 | 3.26       | 0.00 | 3.42       | 0.00 | 9.97      | 0.00 | 1.73       | NS   |
| Sb/Ni  | 1.09        | NS   | 0.49       | NS   | 0.44       | NS   | 0.49      | NS   | 0.38       | NS   |
| Sb/Pb  | 2.30        | NS   | 0.09       | NS   | 0.20       | 0.00 | 0.03      | NS   | 0.17       | 0.00 |
| Sb/Se  | 0.87        | NS   | 0.70       | NS   | 0.68       | NS   | 0.81      | NS   | 0.51       | 0.00 |
| Sb/Tl  | 0.37        | 0.00 | 0.48       | 0.00 | 0.35       | 0.00 | 0.40      | 0.00 | 0.44       | 0.00 |
| Sb/U   | 0.46        | 0.00 | 0.43       | 0.00 | 0.29       | 0.00 | 0.53      | NS   | 0.65       | NS   |
| Sb/W   | 0.62        | NS   | 0.44       | 0.00 | 0.29       | 0.00 | 0.47      | NS   | 0.57       | NS   |
| Sb/Zn  | 1.24        | NS   | 0.82       | NS   | 0.65       | NS   | 0.98      | NS   | 0.52       | 0.00 |
| Se/Tl  | 0.47        | 0.00 | 0.78       | NS   | 0.52       | 0.00 | 0.49      | 0.00 | 0.86       | NS   |
| Se/U   | 0.51        | 0.00 | 0.69       | NS   | 0.48       | 0.00 | 0.62      | NS   | 1.19       | NS   |

Table S5. Cont.

| Ratios | LC/ COPD-LC |      | LC/COPD-mi |    | LC/COPD-mi |    | LC/COPD-s |      | LC/COPD-vs |      |
|--------|-------------|------|------------|----|------------|----|-----------|------|------------|------|
|        | FC          | p    | FC         | p  | FC         | p  | FC        | p    | FC         | p    |
| Se/W   | 0.75        | NS   | 0.80       | NS | 0.59       | NS | 0.84      | NS   | 1.17       | NS   |
| Tl/U   | 0.96        | NS   | 0.83       | NS | 0.69       | NS | 1.20      | NS   | 1.44       | 0.01 |
| Tl/Zn  | 2.64        | 0.00 | 0.27       | NS | 1.94       | NS | 2.89      | 0.00 | 1.24       | NS   |
| U/V    | 2200.65     | NS   | 650.61     | NS | 510.12     | NS | 1790.13   | NS   | 507.15     | NS   |
| U/W    | 1.43        | NS   | 0.93       | NS | 1.31       | NS | 1.24      | NS   | 0.84       | NS   |
| W/Zn   | 3.55        | NS   | 0.93       | NS | 1.25       | NS | 2.86      | NS   | 1.36       | NS   |

**Table S6.** Elemental ratios fold changes of different groups versus COPD-LC. Significant p-values are shown in red color. NS: Non-significant. HC: Healthy control; LC: lung cancer; COPD: chronic obstructively pulmonary disease; COPD-LC: patients who developed LC during the follow-up; COPD-vs: very severe COPD; COPD-s: severe COPD, COPD-mo: moderate COPD and COPD-mi: mild COPD.

| Ratios | COPD-LC /COPD-mi |      | COPD-LC /COPD-mo |    | COPD-LC /COPD-se |    | COPD-LC /COPD-vs |      |
|--------|------------------|------|------------------|----|------------------|----|------------------|------|
|        | FC               | p    | FC               | p  | FC               | p  | FC               | p    |
| Al/As  | 0.17             | NS   | 0.34             | NS | 0.55             | NS | 0.19             | 0.00 |
| Al/Co  | 0.04             | 0.00 | 0.07             | NS | 0.06             | NS | 0.02             | 0.00 |
| Al/Cr  | 0.03             | 0.00 | 0.05             | NS | 0.10             | NS | 0.02             | 0.00 |
| Al/Cu  | 0.03             | 0.00 | 0.06             | NS | 0.12             | NS | 0.02             | 0.00 |
| Al/Fe  | 0.03             | 0.00 | 0.05             | NS | 0.15             | NS | 0.02             | 0.00 |
| Al/Mg  | 0.03             | 0.00 | 0.05             | NS | 0.10             | NS | 0.02             | 0.00 |
| Al/Mn  | 0.08             | 0.00 | 0.06             | NS | 0.24             | NS | 0.07             | 0.00 |
| Al/Mo  | 0.06             | 0.00 | 0.08             | NS | 0.22             | NS | 0.03             | 0.00 |
| Al/Ni  | 0.01             | 0.00 | 0.03             | NS | 0.04             | NS | 0.01             | 0.00 |
| Al/Pb  | 0.00             | 0.00 | 0.00             | NS | 0.00             | NS | 0.00             | 0.00 |
| Al/Sb  | 0.03             | 0.00 | 0.08             | NS | 0.19             | NS | 0.03             | 0.00 |
| Al/Se  | 0.02             | 0.00 | 0.04             | NS | 0.07             | NS | 0.02             | 0.00 |
| Al/Tl  | 0.04             | 0.00 | 0.07             | NS | 0.10             | NS | 0.04             | 0.00 |
| Al/U   | 0.03             | 0.00 | 0.03             | NS | 0.08             | NS | 0.04             | 0.00 |
| Al/V   | 0.01             | NS   | 0.03             | NS | 0.09             | NS | 0.02             | 0.00 |
| Al/W   | 0.02             | 0.00 | 0.02             | NS | 0.05             | NS | 0.03             | 0.00 |
| Al/Zn  | 0.02             | 0.00 | 0.03             | NS | 0.08             | NS | 0.02             | 0.00 |
| As/Co  | 0.54             | NS   | 0.52             | NS | 0.45             | NS | 0.28             | 0.00 |
| As/Cr  | 0.38             | 0.00 | 0.33             | NS | 0.57             | NS | 0.26             | 0.00 |
| As/Cu  | 0.36             | 0.00 | 0.39             | NS | 0.68             | NS | 0.26             | 0.00 |
| As/Fe  | 0.29             | 0.01 | 0.31             | NS | 0.66             | NS | 0.18             | 0.00 |
| As/Mg  | 0.32             | 0.00 | 0.30             | NS | 0.52             | NS | 0.21             | 0.00 |
| As/Mn  | 0.67             | NS   | 0.28             | NS | 0.79             | NS | 0.48             | NS   |
| As/Mo  | 0.70             | NS   | 0.57             | NS | 0.49             | NS | 0.34             | NS   |
| As/Ni  | 0.16             | 0.00 | 0.15             | NS | 0.21             | NS | 0.11             | 0.00 |
| As/Sb  | 0.40             | 0.01 | 0.54             | NS | 0.81             | NS | 0.31             | 0.00 |
| As/Se  | 0.28             | 0.00 | 0.31             | NS | 0.44             | NS | 0.19             | 0.00 |
| As/Tl  | 0.46             | 0.01 | 0.42             | NS | 0.54             | NS | 0.38             | 0.00 |
| As/U   | 0.36             | 0.01 | 0.21             | NS | 0.52             | NS | 0.47             | 0.01 |
| As/V   | 0.11             | NS   | 0.21             | NS | 0.75             | NS | 0.19             | 0.02 |
| As/W   | 0.26             | 0.00 | 0.15             | NS | 0.36             | NS | 0.31             | 0.00 |
| As/Zn  | 0.23             | 0.00 | 0.19             | NS | 0.37             | NS | 0.14             | 0.00 |
| Cd/Co  | 0.19             | NS   | 0.38             | NS | 0.50             | NS | 0.12             | 0.00 |
| Cd/Cr  | 0.14             | NS   | 0.21             | NS | 0.41             | NS | 0.11             | 0.00 |
| Cd/Cu  | 0.20             | NS   | 0.35             | NS | 0.88             | NS | 0.17             | 0.00 |
| Cd/Fe  | 0.13             | NS   | 0.19             | NS | 0.53             | NS | 0.08             | 0.00 |
| Cd/Mg  | 0.12             | NS   | 0.21             | NS | 0.48             | NS | 0.09             | 0.00 |

Table S6. *Cont.*

| Ratios | COPD-LC /COPD-mi |      | COPD-LC /COPD-mo |      | COPD-LC /COPD-se |      | COPD-LC /COPD-vs |      |
|--------|------------------|------|------------------|------|------------------|------|------------------|------|
|        | FC               | p    | FC               | p    | FC               | p    | FC               | p    |
| Cd/Mo  | 0.44             | NS   | 0.56             | NS   | 1.70             | NS   | 0.23             | 0.01 |
| Cd/Ni  | 0.07             | NS   | 0.11             | NS   | 0.18             | NS   | 0.05             | 0.00 |
| Cd/Pb  | 0.00             | NS   | 0.00             | NS   | 0.00             | NS   | 0.00             | 0.00 |
| Cd/Sb  | 0.16             | NS   | 0.41             | NS   | 0.90             | NS   | 0.14             | 0.00 |
| Cd/Se  | 0.11             | NS   | 0.18             | NS   | 0.34             | NS   | 0.08             | 0.00 |
| Cd/Tl  | 0.18             | NS   | 0.28             | NS   | 0.34             | NS   | 0.17             | 0.00 |
| Cd/U   | 0.16             | NS   | 0.14             | NS   | 0.48             | NS   | 0.24             | 0.00 |
| Cd/V   | 0.01             | NS   | 0.01             | NS   | 0.06             | NS   | 0.01             | 0.00 |
| Cd/W   | 0.14             | 0.01 | 0.10             | NS   | 0.30             | NS   | 0.15             | 0.00 |
| Cd/Zn  | 0.10             | NS   | 0.15             | NS   | 0.45             | NS   | 0.07             | 0.00 |
| Co/Cr  | 0.98             | NS   | 0.90             | NS   | 0.68             | NS   | 1.52             | NS   |
| Co/Cu  | 0.53             | NS   | 0.81             | NS   | 0.68             | NS   | 1.62             | NS   |
| Co/Mn  | 1.06             | NS   | 0.80             | NS   | 1.34             | NS   | 3.47             | 0.01 |
| Co/Pb  | 0.01             | NS   | 0.05             | NS   | 0.00             | NS   | 0.04             | 0.00 |
| Co/Sb  | 0.71             | NS   | 1.65             | NS   | 3.27             | NS   | 1.58             | NS   |
| Co/Tl  | 1.07             | NS   | 1.11             | NS   | 0.84             | NS   | 2.79             | NS   |
| Co/U   | 0.60             | NS   | 0.74             | NS   | 0.73             | NS   | 2.98             | NS   |
| Co/W   | 0.47             | NS   | 0.68             | NS   | 0.85             | NS   | 1.94             | NS   |
| Cr/Mn  | 2.20             | 0.01 | 1.31             | NS   | 2.00             | NS   | 2.97             | 0.00 |
| Cr/Ni  | 0.41             | 0.00 | 0.50             | 0.00 | 0.37             | 0.00 | 0.42             | 0.00 |
| Cr/Sb  | 1.11             | NS   | 1.85             | NS   | 2.36             | NS   | 1.43             | NS   |
| Cr/U   | 0.91             | NS   | 0.86             | NS   | 1.07             | NS   | 1.77             | 0.00 |
| Cu/Fe  | 1.01             | NS   | 0.81             | NS   | 0.95             | NS   | 0.79             | NS   |
| Cu/Mg  | 0.65             | NS   | 0.92             | NS   | 0.82             | NS   | 0.79             | 0.01 |
| Cu/Mn  | 2.67             | 0.00 | 1.18             | NS   | 1.40             | NS   | 2.51             | 0.00 |
| Cu/Mo  | 2.57             | NS   | 2.32             | NS   | 1.41             | NS   | 1.66             | NS   |
| Cu/Ni  | 0.44             | 0.00 | 0.45             | 0.00 | 0.30             | 0.00 | 0.38             | 0.00 |
| Cu/Pb  | 0.03             | NS   | 0.07             | NS   | 0.01             | NS   | 0.07             | 0.01 |
| Cu/Se  | 0.87             | NS   | 0.87             | NS   | 0.73             | NS   | 0.76             | 0.02 |
| Cu/Tl  | 1.19             | NS   | 0.89             | NS   | 0.70             | NS   | 1.23             | NS   |
| Cu/U   | 1.08             | NS   | 0.78             | NS   | 0.89             | NS   | 1.71             | 0.00 |
| Cu/W   | 0.79             | NS   | 0.63             | NS   | 0.73             | NS   | 1.09             | NS   |
| Cu/Zn  | 0.80             | NS   | 0.67             | NS   | 0.70             | NS   | 0.61             | 0.00 |
| Fe/Mn  | 2.52             | 0.00 | 1.38             | NS   | 1.72             | NS   | 2.57             | 0.00 |
| Fe/Ni  | 0.50             | 0.00 | 0.62             | NS   | 0.28             | 0.00 | 0.45             | 0.01 |
| Fe/Sb  | 1.33             | NS   | 2.18             | NS   | 1.97             | NS   | 1.54             | NS   |
| Fe/U   | 1.11             | NS   | 0.93             | NS   | 0.80             | NS   | 1.77             | 0.02 |
| Fe/Zn  | 0.82             | NS   | 0.84             | NS   | 0.66             | NS   | 0.68             | NS   |
| Mg/Mn  | 3.05             | 0.00 | 1.28             | NS   | 1.94             | NS   | 3.22             | 0.00 |



Table S6. *Cont.*

| Ratios | COPD-LC /COPD-mi |      | COPD-LC /COPD-mo |      | COPD-LC /COPD-se |      | COPD-LC /COPD-vs |      |
|--------|------------------|------|------------------|------|------------------|------|------------------|------|
|        | FC               | p    | FC               | p    | FC               | p    | FC               | p    |
| Mg/Mo  | 2.40             | NS   | 2.21             | NS   | 1.53             | NS   | 1.83             | NS   |
| Mg/Ni  | 0.49             | 0.00 | 0.50             | 0.00 | 0.36             | 0.00 | 0.49             | 0.00 |
| Mg/Pb  | 0.03             | NS   | 0.08             | NS   | 0.01             | NS   | 0.10             | 0.01 |
| Mg/Tl  | 1.41             | NS   | 0.99             | NS   | 0.92             | NS   | 1.65             | 0.00 |
| Mg/U   | 1.19             | NS   | 0.85             | NS   | 1.09             | NS   | 2.12             | 0.00 |
| Mg/W   | 0.89             | NS   | 0.73             | NS   | 0.91             | NS   | 1.38             | NS   |
| Mg/Zn  | 0.89             | NS   | 0.72             | NS   | 0.88             | NS   | 0.77             | 0.01 |
| Mn/Ni  | 0.19             | 0.00 | 0.45             | NS   | 0.22             | 0.00 | 0.14             | 0.00 |
| Mn/Pb  | 0.04             | NS   | 0.25             | NS   | 0.02             | NS   | 0.08             | 0.01 |
| Mn/Sb  | 0.47             | NS   | 1.31             | NS   | 1.33             | NS   | 0.42             | 0.00 |
| Mn/Se  | 0.36             | 0.01 | 0.87             | NS   | 0.54             | NS   | 0.20             | NS   |
| Mn/Tl  | 0.64             | NS   | 1.15             | NS   | 0.67             | NS   | 0.47             | NS   |
| Mn/U   | 0.53             | NS   | 0.82             | NS   | 0.66             | NS   | 0.57             | NS   |
| Mn/Zn  | 0.27             | NS   | 0.61             | NS   | 0.47             | NS   | 0.14             | NS   |
| Mo/Ni  | 0.39             | 0.00 | 0.50             | NS   | 0.22             | 0.00 | 0.33             | NS   |
| Mo/Pb  | 0.00             | NS   | 0.00             | NS   | 0.00             | NS   | 0.00             | 0.00 |
| Mo/Tl  | 1.24             | NS   | 0.88             | NS   | 0.61             | NS   | 1.46             | NS   |
| Mo/U   | 0.99             | NS   | 0.83             | NS   | 0.71             | NS   | 1.54             | NS   |
| Ni/Mo  | 4.00             | 0.01 | 3.96             | NS   | 4.03             | NS   | 2.89             | NS   |
| Ni/Sb  | 2.65             | 0.00 | 2.51             | NS   | 6.09             | 0.00 | 3.17             | 0.00 |
| Ni/Se  | 1.71             | 0.00 | 1.61             | NS   | 2.37             | 0.00 | 1.54             | NS   |
| Ni/Tl  | 2.73             | 0.00 | 1.64             | NS   | 2.55             | 0.00 | 2.99             | 0.00 |
| Ni/U   | 2.17             | 0.00 | 1.61             | NS   | 2.94             | 0.00 | 3.95             | 0.00 |
| Ni/W   | 1.52             | NS   | 1.32             | NS   | 2.39             | 0.00 | 2.52             | 0.00 |
| Ni/Zn  | 0.24             | NS   | 1.34             | NS   | 2.35             | 0.00 | 1.24             | NS   |
| Pb/Ni  | 0.03             | 0.00 | 0.03             | NS   | 0.05             | NS   | 0.02             | 0.00 |
| Pb/Sb  | 0.07             | 0.01 | 0.11             | NS   | 0.44             | NS   | 0.06             | 0.00 |
| Pb/Se  | 0.04             | 0.00 | 0.05             | NS   | 0.10             | NS   | 0.02             | NS   |
| Pb/Tl  | 0.11             | 0.00 | 0.13             | NS   | 0.18             | NS   | 0.09             | 0.00 |
| Pb/U   | 0.06             | 0.01 | 0.04             | NS   | 0.16             | NS   | 0.10             | 0.00 |
| Pb/V   | 0.00             | NS   | 0.00             | NS   | 0.00             | NS   | 0.00             | NS   |
| Pb/W   | 0.06             | 0.00 | 0.04             | NS   | 0.12             | NS   | 0.08             | 0.00 |
| Pb/Zn  | 0.04             | 0.00 | 0.04             | NS   | 0.13             | NS   | 0.02             | NS   |
| Sb/Ni  | 0.45             | 0.00 | 0.41             | NS   | 0.45             | NS   | 0.34             | 0.00 |
| Sb/Pb  | 0.04             | NS   | 0.09             | NS   | 0.01             | NS   | 0.07             | 0.00 |
| Sb/Se  | 0.81             | NS   | 0.79             | NS   | 0.93             | NS   | 0.58             | NS   |
| Sb/Tl  | 1.30             | NS   | 0.94             | NS   | 1.08             | NS   | 1.18             | NS   |
| Sb/U   | 0.94             | NS   | 0.63             | NS   | 1.16             | NS   | 1.41             | NS   |
| Sb/W   | 0.71             | NS   | 0.47             | NS   | 0.76             | NS   | 0.91             | NS   |

**Table S6. Cont.**

| Ratios       | COPD-LC /COPD-mi |      | COPD-LC /COPD-mo |    | COPD-LC /COPD-se |    | COPD-LC /COPD-vs |      |
|--------------|------------------|------|------------------|----|------------------|----|------------------|------|
|              | FC               | p    | FC               | p  | FC               | p  | FC               | p    |
| <b>Sb/Zn</b> | 0.66             | NS   | 0.52             | NS | 0.79             | NS | 0.42             | 0.01 |
| <b>Se/Tl</b> | 1.67             | 0.00 | 1.10             | NS | 1.06             | NS | 1.85             | 0.00 |
| <b>Se/U</b>  | 1.35             | NS   | 0.93             | NS | 1.21             | NS | 2.32             | 0.00 |
| <b>Se/W</b>  | 1.07             | NS   | 0.79             | NS | 1.11             | NS | 1.55             | 0.00 |
| <b>Tl/U</b>  | 0.86             | NS   | 0.72             | NS | 1.25             | NS | 1.50             | 0.01 |
| <b>Tl/Zn</b> | 0.10             | NS   | 0.74             | NS | 1.09             | NS | 0.47             | 0.01 |
| <b>U/V</b>   | 0.30             | NS   | 0.23             | NS | 0.81             | NS | 0.23             | 0.02 |
| <b>U/W</b>   | 0.65             | NS   | 0.91             | NS | 0.86             | NS | 0.59             | 0.00 |
| <b>W/Zn</b>  | 0.26             | NS   | 0.35             | NS | 0.81             | NS | 0.38             | 0.01 |

**Table S7.** Elemental ratios fold changes of different COPD groups. Significant p-values are shown in red color. NS: Non-significant. HC: Healthy control; LC: lung cancer; COPD: chronic obstructively pulmonary disease; COPD-LC: patients who developed LC during the follow-up; COPD-vs: very severe COPD; COPD-s: severe COPD, COPD-mo: moderate COPD and COPD-mi: mild COPD.

| Ratios | COPD-vs/COPD-mo |      | COPD-vs/COPD-se |      | COPD-vs/COPD-mi |      | COPD-mo/COPD-mi |    |
|--------|-----------------|------|-----------------|------|-----------------|------|-----------------|----|
|        | FC              | p    | FC              | p    | FC              | p    | FC              | p  |
| Al/As  | 1.81            | NS   | 2.92            | 0.00 | 0.90            | NS   | 0.50            | NS |
| Al/Co  | 3.06            | NS   | 2.74            | NS   | 1.82            | NS   | 0.60            | NS |
| Al/Cr  | 1.92            | NS   | 4.33            | 0.00 | 1.37            | NS   | 0.71            | NS |
| Al/Cu  | 2.36            | NS   | 5.01            | 0.00 | 1.29            | NS   | 0.55            | NS |
| Al/Fe  | 2.66            | NS   | 8.79            | 0.00 | 1.58            | NS   | 0.59            | NS |
| Al/Mg  | 2.58            | NS   | 4.85            | 0.00 | 1.43            | NS   | 0.55            | NS |
| Al/Mn  | 0.85            | NS   | 3.66            | NS   | 1.21            | NS   | 1.42            | NS |
| Al/Mo  | 2.50            | NS   | 6.77            | 0.00 | 1.66            | NS   | 0.66            | NS |
| Al/Ni  | 2.49            | 0.00 | 4.26            | 0.00 | 1.43            | NS   | 0.57            | NS |
| Al/Pb  | 3.36            | 0.00 | 1.26            | NS   | 1.24            | NS   | 0.37            | NS |
| Al/Sb  | 2.72            | 0.00 | 6.64            | 0.00 | 1.20            | NS   | 0.44            | NS |
| Al/Se  | 2.33            | NS   | 3.99            | 0.00 | 1.36            | NS   | 0.58            | NS |
| Al/Tl  | 1.98            | NS   | 2.53            | 0.01 | 1.08            | NS   | 0.55            | NS |
| Al/U   | 0.63            | NS   | 1.96            | NS   | 0.63            | NS   | 1.01            | NS |
| Al/V   | 1.63            | NS   | 5.83            | NS   | 0.57            | NS   | 0.35            | NS |
| Al/W   | 0.77            | NS   | 1.60            | NS   | 0.73            | NS   | 0.95            | NS |
| Al/Zn  | 2.17            | NS   | 4.99            | 0.00 | 1.48            | NS   | 0.68            | NS |
| As/Co  | 1.85            | NS   | 1.60            | NS   | 1.93            | 0.00 | 1.04            | NS |
| As/Cr  | 1.25            | NS   | 2.14            | 0.00 | 1.46            | NS   | 1.16            | NS |
| As/Cu  | 1.46            | NS   | 2.56            | 0.00 | 1.36            | NS   | 0.93            | NS |
| As/Fe  | 1.72            | NS   | 3.70            | 0.00 | 1.63            | NS   | 0.95            | NS |
| As/Mg  | 1.46            | NS   | 2.52            | 0.00 | 1.52            | NS   | 1.04            | NS |
| As/Mn  | 0.57            | NS   | 1.63            | NS   | 1.39            | NS   | 2.42            | NS |
| As/Mo  | 1.65            | NS   | 1.44            | NS   | 2.03            | NS   | 1.23            | NS |
| As/Ni  | 1.41            | NS   | 1.91            | 0.00 | 1.51            | NS   | 1.07            | NS |
| As/Sb  | 1.78            | NS   | 2.66            | 0.00 | 1.31            | NS   | 0.74            | NS |
| As/Se  | 1.60            | NS   | 2.28            | 0.00 | 1.45            | NS   | 0.90            | NS |
| As/Tl  | 1.10            | NS   | 1.43            | NS   | 1.21            | NS   | 1.10            | NS |

Table S7. *Cont.*

| Ratios | COPD-vs/COPD-mo |      | COPD-vs/COPD-se |      | COPD-vs/COPD-mi |    | COPD-mo/COPD-mi |    |
|--------|-----------------|------|-----------------|------|-----------------|----|-----------------|----|
|        | FC              | p    | FC              | p    | FC              | p  | FC              | p  |
| As/U   | 0.45            | NS   | 1.11            | NS   | 0.75            | NS | 1.66            | NS |
| As/V   | 1.13            | NS   | 3.97            | NS   | 0.59            | NS | 0.53            | NS |
| As/W   | 0.48            | NS   | 1.15            | NS   | 0.83            | NS | 1.72            | NS |
| As/Zn  | 1.35            | NS   | 2.62            | 0.00 | 1.60            | NS | 1.19            | NS |
| Cd/Co  | 3.06            | NS   | 4.11            | NS   | 1.56            | NS | 0.51            | NS |
| Cd/Cr  | 1.94            | NS   | 3.76            | 0.01 | 1.30            | NS | 0.67            | NS |
| Cd/Cu  | 2.09            | NS   | 5.18            | 0.00 | 1.16            | NS | 0.55            | NS |
| Cd/Fe  | 2.50            | NS   | 6.82            | 0.01 | 1.63            | NS | 0.65            | NS |
| Cd/Mg  | 2.29            | NS   | 5.24            | 0.00 | 1.33            | NS | 0.58            | NS |
| Cd/Mo  | 2.43            | NS   | 7.42            | NS   | 1.93            | NS | 0.79            | NS |
| Cd/Ni  | 2.30            | NS   | 3.73            | NS   | 1.52            | NS | 0.66            | NS |
| Cd/Pb  | 3.71            | NS   | 1.43            | NS   | 0.36            | NS | 0.10            | NS |
| Cd/Sb  | 3.01            | NS   | 6.55            | 0.00 | 1.14            | NS | 0.38            | NS |
| Cd/Se  | 2.20            | NS   | 4.24            | 0.00 | 1.31            | NS | 0.59            | NS |
| Cd/Tl  | 1.70            | NS   | 2.05            | NS   | 1.09            | NS | 0.64            | NS |
| Cd/U   | 0.57            | NS   | 2.00            | NS   | 0.66            | NS | 1.16            | NS |
| Cd/V   | 1.38            | NS   | 6.22            | NS   | 0.56            | NS | 0.41            | NS |
| Cd/W   | 0.67            | NS   | 1.97            | NS   | 0.90            | NS | 1.36            | NS |
| Cd/Zn  | 1.98            | NS   | 6.04            | 0.00 | 1.42            | NS | 0.72            | NS |
| Co/Cr  | 0.59            | NS   | 0.45            | NS   | 0.64            | NS | 1.09            | NS |
| Co/Cu  | 0.50            | NS   | 0.42            | NS   | 0.33            | NS | 0.66            | NS |
| Co/Mn  | 0.23            | NS   | 0.39            | NS   | 0.31            | NS | 1.33            | NS |
| Co/Pb  | 1.14            | NS   | 0.09            | NS   | 0.29            | NS | 0.25            | NS |
| Co/Sb  | 1.04            | NS   | 2.06            | NS   | 0.45            | NS | 0.43            | NS |
| Co/Tl  | 0.40            | NS   | 0.30            | 0.00 | 0.39            | NS | 0.97            | NS |
| Co/U   | 0.25            | 0.00 | 0.24            | 0.00 | 0.20            | NS | 0.81            | NS |
| Co/W   | 0.35            | 0.00 | 0.44            | 0.01 | 0.24            | NS | 0.69            | NS |
| Cr/Mn  | 0.44            | NS   | 0.67            | NS   | 0.74            | NS | 1.68            | NS |

Table S7. *Cont.*

| Ratios | COPD-vs/COPD-mo |      | COPD-vs/COPD-se |      | COPD-vs/COPD-mi |    | COPD-mo/COPD-mi |      |
|--------|-----------------|------|-----------------|------|-----------------|----|-----------------|------|
|        | FC              | p    | FC              | p    | FC              | p  | FC              | p    |
| Cr/Ni  | 1.17            | NS   | 0.87            | NS   | 0.97            | NS | 0.83            | NS   |
| Cr/Sb  | 1.29            | NS   | 1.65            | NS   | 0.77            | NS | 0.60            | NS   |
| Cr/U   | 0.49            | 0.00 | 0.61            | 0.01 | 0.51            | NS | 1.06            | NS   |
| Cu/Fe  | 1.03            | NS   | 1.21            | NS   | 1.28            | NS | 1.24            | NS   |
| Cu/Mg  | 1.17            | NS   | 1.04            | NS   | 0.82            | NS | 0.70            | NS   |
| Cu/Mn  | 0.47            | NS   | 0.56            | NS   | 1.06            | NS | 2.26            | NS   |
| Cu/Mo  | 1.40            | NS   | 0.85            | NS   | 1.55            | NS | 1.11            | NS   |
| Cu/Ni  | 1.20            | NS   | 0.78            | NS   | 1.15            | NS | 0.96            | NS   |
| Cu/Pb  | 0.98            | NS   | 0.08            | NS   | 0.43            | NS | 0.44            | NS   |
| Cu/Se  | 1.14            | NS   | 0.96            | NS   | 1.14            | NS | 1.00            | NS   |
| Cu/Tl  | 0.72            | NS   | 0.57            | 0.00 | 0.96            | NS | 1.33            | NS   |
| Cu/U   | 0.45            | 0.00 | 0.52            | 0.00 | 0.63            | NS | 1.39            | NS   |
| Cu/W   | 0.58            | NS   | 0.67            | NS   | 0.73            | NS | 1.25            | NS   |
| Cu/Zn  | 1.09            | NS   | 1.14            | NS   | 1.30            | NS | 1.19            | NS   |
| Fe/Mn  | 0.54            | NS   | 0.67            | NS   | 0.98            | NS | 1.82            | NS   |
| Fe/Ni  | 1.36            | NS   | 0.62            | NS   | 1.10            | NS | 0.81            | NS   |
| Fe/Sb  | 1.41            | NS   | 1.28            | NS   | 0.86            | NS | 0.61            | NS   |
| Fe/U   | 0.53            | NS   | 0.45            | 0.00 | 0.63            | NS | 1.19            | NS   |
| Fe/Zn  | 1.22            | NS   | 0.96            | NS   | 1.20            | NS | 0.98            | NS   |
| Mg/Mn  | 0.40            | NS   | 0.60            | NS   | 0.95            | NS | 2.39            | 0.00 |
| Mg/Mo  | 1.21            | NS   | 0.84            | NS   | 1.31            | NS | 1.08            | NS   |
| Mg/Ni  | 1.03            | NS   | 0.74            | NS   | 1.00            | NS | 0.98            | NS   |
| Mg/Pb  | 0.72            | NS   | 0.09            | NS   | 0.33            | NS | 0.46            | NS   |
| Mg/Tl  | 0.60            | NS   | 0.56            | 0.00 | 0.85            | NS | 1.43            | NS   |
| Mg/U   | 0.40            | 0.00 | 0.51            | 0.00 | 0.56            | NS | 1.40            | NS   |
| Mg/W   | 0.53            | NS   | 0.66            | NS   | 0.65            | NS | 1.22            | NS   |
| Mg/Zn  | 0.93            | NS   | 1.14            | NS   | 1.15            | NS | 1.23            | NS   |
| Mn/Ni  | 3.12            | NS   | 1.52            | NS   | 1.32            | NS | 0.42            | NS   |

Table S7. *Cont.*

| Ratios       | COPD-vs/COPD-mo |      | COPD-vs/COPD-se |      | COPD-vs/COPD-mi |    | COPD-mo/COPD-mi |    |
|--------------|-----------------|------|-----------------|------|-----------------|----|-----------------|----|
|              | FC              | p    | FC              | p    | FC              | p  | FC              | p  |
| <b>Mn/Pb</b> | 3.24            | NS   | 0.27            | NS   | 0.48            | NS | 0.15            | NS |
| <b>Mn/Sb</b> | 3.13            | NS   | 3.16            | 0.00 | 1.12            | NS | 0.36            | NS |
| <b>Mn/Se</b> | 4.37            | NS   | 2.71            | NS   | 1.84            | NS | 0.42            | NS |
| <b>Mn/Tl</b> | 2.44            | NS   | 1.41            | NS   | 1.36            | NS | 0.56            | NS |
| <b>Mn/U</b>  | 1.44            | NS   | 1.15            | NS   | 0.93            | NS | 0.64            | NS |
| <b>Mn/Zn</b> | 4.45            | NS   | 3.42            | NS   | 2.01            | NS | 0.45            | NS |
| <b>Mo/Ni</b> | 1.52            | NS   | 0.68            | NS   | 1.19            | NS | 0.78            | NS |
| <b>Mo/Pb</b> | 0.42            | NS   | 0.04            | NS   | 0.36            | NS | 0.85            | NS |
| <b>Mo/Tl</b> | 0.60            | NS   | 0.42            | 0.01 | 0.85            | NS | 1.40            | NS |
| <b>Mo/U</b>  | 0.54            | NS   | 0.46            | NS   | 0.64            | NS | 1.20            | NS |
| <b>Ni/Mo</b> | 1.37            | NS   | 1.39            | NS   | 1.38            | NS | 1.01            | NS |
| <b>Ni/Sb</b> | 0.79            | NS   | 1.92            | 0.01 | 0.84            | NS | 1.05            | NS |
| <b>Ni/Se</b> | 1.05            | NS   | 1.55            | NS   | 1.11            | NS | 1.06            | NS |
| <b>Ni/Tl</b> | 0.55            | NS   | 0.85            | NS   | 0.91            | NS | 1.67            | NS |
| <b>Ni/U</b>  | 0.41            | 0.00 | 0.74            | NS   | 0.55            | NS | 1.34            | NS |
| <b>Ni/W</b>  | 0.52            | NS   | 0.95            | NS   | 0.60            | NS | 1.15            | NS |
| <b>Ni/Zn</b> | 1.08            | NS   | 1.90            | NS   | 0.20            | NS | 0.18            | NS |
| <b>Pb/Ni</b> | 1.94            | NS   | 3.22            | NS   | 1.68            | NS | 0.87            | NS |
| <b>Pb/Sb</b> | 1.80            | NS   | 7.14            | 0.00 | 1.19            | NS | 0.66            | NS |
| <b>Pb/Se</b> | 2.17            | NS   | 4.56            | NS   | 1.75            | NS | 0.80            | NS |
| <b>Pb/Tl</b> | 1.40            | NS   | 2.01            | NS   | 1.17            | NS | 0.83            | NS |
| <b>Pb/U</b>  | 0.46            | NS   | 1.63            | NS   | 0.65            | NS | 1.41            | NS |
| <b>Pb/V</b>  | 1.31            | NS   | 2.27            | NS   | 0.71            | NS | 0.54            | NS |
| <b>Pb/W</b>  | 0.53            | NS   | 1.55            | NS   | 0.74            | NS | 1.40            | NS |
| <b>Pb/Zn</b> | 1.97            | NS   | 5.76            | NS   | 1.88            | NS | 0.95            | NS |
| <b>Sb/Ni</b> | 1.18            | NS   | 1.30            | NS   | 1.31            | NS | 1.11            | NS |
| <b>Sb/Pb</b> | 1.18            | NS   | 0.15            | NS   | 0.51            | NS | 0.43            | NS |
| <b>Sb/Se</b> | 1.35            | NS   | 1.60            | NS   | 1.38            | NS | 1.03            | NS |

**Table S7.** *Cont.*

| Ratios       | COPD-vs/COPD-mo |      | COPD-vs/COPD-se |      | COPD-vs/COPD-mi |    | COPD-mo/COPD-mi |    |
|--------------|-----------------|------|-----------------|------|-----------------|----|-----------------|----|
|              | FC              | p    | FC              | p    | FC              | p  | FC              | p  |
| <b>Sb/Tl</b> | 0.80            | NS   | 0.91            | NS   | 1.10            | NS | 1.38            | NS |
| <b>Sb/U</b>  | 0.45            | NS   | 0.83            | NS   | 0.67            | NS | 1.49            | NS |
| <b>Sb/W</b>  | 0.52            | NS   | 0.83            | NS   | 0.78            | NS | 1.51            | NS |
| <b>Sb/Zn</b> | 1.25            | NS   | 1.89            | NS   | 1.59            | NS | 1.27            | NS |
| <b>Se/Tl</b> | 0.60            | NS   | 0.57            | 0.00 | 0.90            | NS | 1.51            | NS |
| <b>Se/U</b>  | 0.40            | 0.00 | 0.52            | 0.00 | 0.58            | NS | 1.46            | NS |
| <b>Se/W</b>  | 0.51            | NS   | 0.72            | NS   | 0.69            | NS | 1.35            | NS |
| <b>Tl/U</b>  | 0.48            | NS   | 0.84            | NS   | 0.58            | NS | 1.20            | NS |
| <b>Tl/Zn</b> | 1.56            | NS   | 2.32            | 0.01 | 0.21            | NS | 0.14            | NS |
| <b>U/V</b>   | 1.01            | NS   | 3.53            | NS   | 1.28            | NS | 1.28            | NS |
| <b>U/W</b>   | 1.55            | NS   | 1.47            | NS   | 1.10            | NS | 0.71            | NS |
| <b>W/Zn</b>  | 0.92            | NS   | 2.11            | NS   | 0.68            | NS | 0.74            | NS |

**Table S8.** Metal ratios with AUC values of ROC curves higher than 0.75.

| Ratios | AUC values  |         |             |             |             |
|--------|-------------|---------|-------------|-------------|-------------|
|        | LC/HC       | COPD/HC | COPD-LC /HC | COPD-s/HC   | COPD-vs/HC  |
| Al/As  | <b>0.80</b> | <0.75   | <0.75       | <0.75       | <0.75       |
| Al/Co  | <b>0.81</b> | <0.75   | <0.75       | <0.75       | <0.75       |
| Al/Cr  | <b>0.75</b> | <0.75   | <0.75       | <0.75       | <0.75       |
| Al/Cu  | <b>0.84</b> | <0.75   | <b>0.83</b> | <0.75       | <0.75       |
| Al/Fe  | <b>0.77</b> | <0.75   | <0.75       | <0.75       | <0.75       |
| Al/Mg  | <b>0.86</b> | <0.75   | <0.75       | <0.75       | <0.75       |
| Al/Mn  | <b>0.79</b> | <0.75   | <0.75       | <0.75       | <0.75       |
| Al/Mo  | <b>0.75</b> | <0.75   | <0.75       | <0.75       | <0.75       |
| Al/Pb  | <b>0.76</b> | <0.75   | <b>0.82</b> | <0.75       | <0.75       |
| Al/Sb  | <b>0.87</b> | <0.75   | <0.75       | <0.75       | <0.75       |
| Al/Se  | <b>0.82</b> | <0.75   | <0.75       | <0.75       | <0.75       |
| Al/Tl  | <b>0.78</b> | <0.75   | <0.75       | <0.75       | <0.75       |
| Al/U   | <b>0.77</b> | <0.75   | <0.75       | <0.75       | <0.75       |
| Al/Zn  | <b>0.84</b> | <0.75   | <0.75       | <0.75       | <0.75       |
| As/Cr  | <0.75       | <0.75   | <b>0.77</b> | <0.75       | <0.75       |
| As/Cu  | <b>0.81</b> | <0.75   | <0.75       | <b>0.77</b> | <0.75       |
| As/Fe  | <0.75       | <0.75   | <b>0.80</b> | <0.75       | <0.75       |
| As/Mg  | <0.75       | <0.75   | <b>0.83</b> | <0.75       | <0.75       |
| As/Ni  | <0.75       | <0.75   | <0.75       | <0.75       | <b>0.78</b> |
| As/Sb  | <b>0.84</b> | <0.75   | <0.75       | <0.75       | <0.75       |
| As/Se  | <b>0.78</b> | <0.75   | <b>0.80</b> | <0.75       | <0.75       |
| As/Tl  | <0.75       | <0.75   | <b>0.76</b> | <0.75       | <0.75       |
| As/V   | <0.75       | <0.75   | <b>0.80</b> | <b>0.77</b> | <0.75       |
| As/Zn  | <b>0.82</b> | <0.75   | <b>0.80</b> | <0.75       | <0.75       |
| Cd/Co  | <0.75       | <0.75   | <b>0.80</b> | <0.75       | <0.75       |
| Cd/Cr  | <0.75       | <0.75   | <b>0.82</b> | <0.75       | <0.75       |
| Cd/Cu  | <0.75       | <0.75   | <b>0.82</b> | <b>0.80</b> | <0.75       |
| Cd/Fe  | <0.75       | <0.75   | <b>0.83</b> | <b>0.77</b> | <0.75       |
| Cd/Mg  | <0.75       | <0.75   | <b>0.83</b> | <0.75       | <0.75       |
| Cd/Ni  | <0.75       | <0.75   | <b>0.80</b> | <0.75       | <0.75       |
| Cd/Pb  | <0.75       | <0.75   | <b>0.86</b> | <0.75       | <0.75       |
| Cd/Sb  | <0.75       | <0.75   | <b>0.78</b> | <0.75       | <0.75       |
| Cd/Se  | <0.75       | <0.75   | <b>0.83</b> | <0.75       | <0.75       |
| Cd/Tl  | <0.75       | <0.75   | <b>0.80</b> | <0.75       | <0.75       |
| Cd/U   | <0.75       | <0.75   | <b>0.80</b> | <0.75       | <0.75       |
| Cd/W   | <0.75       | <0.75   | <b>0.77</b> | <0.75       | <0.75       |
| Cd/Zn  | <0.75       | <0.75   | <b>0.84</b> | <b>0.79</b> | <0.75       |
| Co/Cu  | <0.75       | <0.75   | <0.75       | <0.75       | <b>0.77</b> |
| Co/Mn  | <0.75       | <0.75   | <b>0.76</b> | <0.75       | <0.75       |
| Co/Pb  | <0.75       | <0.75   | <b>0.91</b> | <0.75       | <0.75       |
| Cr/As  | <0.75       | <0.75   | <b>0.82</b> | <0.75       | <0.75       |
| Cr/Mn  | <0.75       | <0.75   | <b>0.83</b> | <0.75       | <0.75       |
| Cr/Ni  | <0.75       | <0.75   | <0.75       | <b>0.77</b> | <0.75       |
| Cr/Sb  | <b>0.78</b> | <0.75   | <0.75       | <0.75       | <0.75       |
| Cu/Al  | <0.75       | <0.75   | <0.75       | <0.75       | <b>0.81</b> |
| Cu/As  | <b>0.76</b> | <0.75   | <b>0.87</b> | <b>0.81</b> | <0.75       |
| Cu/Mn  | <b>0.78</b> | <0.75   | <b>0.87</b> | <0.75       | <0.75       |
| Cu/Mo  | <0.75       | <0.75   | <0.75       | <0.75       | <b>0.76</b> |
| Cu/Ni  | <0.75       | <0.75   | <0.75       | <b>0.91</b> | <b>0.76</b> |
| Cu/Pb  | <0.75       | <0.75   | <b>0.87</b> | <0.75       | <0.75       |
| Cu/Tl  | <b>0.77</b> | <0.75   | <0.75       | <b>0.79</b> | <0.75       |
| Cu/U   | <0.75       | <0.75   | <0.75       | <b>0.79</b> | <0.75       |
| Fe/As  | <0.75       | <0.75   | <b>0.84</b> | <b>0.80</b> | <0.75       |
| Fe/Mn  | <0.75       | <0.75   | <b>0.85</b> | <b>0.81</b> | <0.75       |



Table S8. *Cont.*

| Ratios | AUC values  |             |             |             |             |
|--------|-------------|-------------|-------------|-------------|-------------|
|        | LC/HC       | COPD/HC     | COPD-LC/HC  | COPD-s/HC   | COPD-vs/HC  |
| Fe/Ni  | <0.75       | <0.75       | <0.75       | <b>0.85</b> | <0.75       |
| Fe/U   | <0.75       | <0.75       | <0.75       | <b>0.79</b> | <0.75       |
| Mg/Al  | <0.75       | <0.75       | <0.75       | <0.75       | <b>0.77</b> |
| Mg/As  | <0.75       | <0.75       | <b>0.90</b> | <b>0.83</b> | <0.75       |
| Mg/Co  | <0.75       | <0.75       | <b>0.80</b> | <0.75       | <b>0.79</b> |
| Mg/Cr  | <0.75       | <0.75       | <b>0.87</b> | <b>0.88</b> | <0.75       |
| Mg/Mn  | <0.75       | <0.75       | <b>0.92</b> | <b>0.85</b> | <0.75       |
| Mg/Ni  | <0.75       | <0.75       | <0.75       | <b>0.91</b> | <0.75       |
| Mg/Pb  | <0.75       | <0.75       | <b>0.86</b> | <0.75       | <0.75       |
| Mg/Tl  | <0.75       | <0.75       | <b>0.83</b> | <b>0.91</b> | <0.75       |
| Mg/U   | <0.75       | <0.75       | <b>0.80</b> | <b>0.77</b> | <0.75       |
| Mg/Zn  | <0.75       | <0.75       | <0.75       | <0.75       | <b>0.77</b> |
| Mn/Co  | <0.75       | <0.75       | <b>0.76</b> | <0.75       | <0.75       |
| Mn/Cr  | <0.75       | <b>0.76</b> | <b>0.83</b> | <0.75       | <0.75       |
| Mn/Cu  | <b>0.78</b> | <0.75       | <b>0.87</b> | <b>0.76</b> | <0.75       |
| Mn/Fe  | <0.75       | <0.75       | <b>0.85</b> | <b>0.81</b> | <0.75       |
| Mn/Mg  | <0.75       | <0.75       | <b>0.90</b> | <b>0.82</b> | <0.75       |
| Mn/Ni  | <0.75       | <0.75       | <b>0.82</b> | <0.75       | <0.75       |
| Mn/Pb  | <0.75       | <0.75       | <b>0.88</b> | <0.75       | <0.75       |
| Mn/Sb  | <b>0.84</b> | <0.75       | <0.75       | <b>0.77</b> | <0.75       |
| Mn/Se  | <0.75       | <0.75       | <b>0.94</b> | <b>0.78</b> | <0.75       |
| Mn/Zn  | <b>0.81</b> | <0.75       | <b>0.97</b> | <b>0.80</b> | <0.75       |
| Mo/As  | <0.75       | <0.75       | <0.75       | <b>0.78</b> | <0.75       |
| Mo/Pb  | <0.75       | <0.75       | <b>0.84</b> | <0.75       | <0.75       |
| Ni/As  | <0.75       | <0.75       | <b>0.86</b> | <0.75       | <0.75       |
| Ni/Co  | <0.75       | <0.75       | <b>0.83</b> | <0.75       | <0.75       |
| Ni/Cr  | <0.75       | <0.75       | <b>0.90</b> | <0.75       | <0.75       |
| Ni/Cu  | <0.75       | <0.75       | <b>0.80</b> | <0.75       | <0.75       |
| Ni/Fe  | <0.75       | <0.75       | <b>0.76</b> | <0.75       | <0.75       |
| Ni/Mg  | <0.75       | <0.75       | <b>0.78</b> | <0.75       | <0.75       |
| Ni/Mn  | <0.75       | <0.75       | <b>0.98</b> | <0.75       | <0.75       |
| Ni/Mo  | <0.75       | <0.75       | <b>0.76</b> | <0.75       | <0.75       |
| Ni/Sb  | <0.75       | <0.75       | <b>0.88</b> | <b>0.77</b> | <0.75       |
| Ni/Se  | <0.75       | <0.75       | <b>0.77</b> | <0.75       | <0.75       |
| Ni/Tl  | <0.75       | <0.75       | <b>0.92</b> | <0.75       | <0.75       |
| Ni/U   | <0.75       | <0.75       | <b>0.91</b> | <0.75       | <0.75       |
| Ni/W   | <0.75       | <0.75       | <b>0.78</b> | <0.75       | <0.75       |
| Pb/Al  | <0.75       | <0.75       | <b>0.82</b> | <0.75       | <0.75       |
| Pb/As  | <b>0.76</b> | <0.75       | <b>0.89</b> | <0.75       | <0.75       |
| Pb/Co  | <b>0.82</b> | <0.75       | <0.75       | <0.75       | <0.75       |
| Pb/Cr  | <b>0.80</b> | <0.75       | <b>0.90</b> | <0.75       | <0.75       |
| Pb/Cu  | <b>0.81</b> | <0.75       | <b>0.91</b> | <0.75       | <0.75       |
| Pb/Fe  | <0.75       | <0.75       | <b>0.91</b> | <b>0.77</b> | <0.75       |
| Pb/Mg  | <b>0.81</b> | <0.75       | <b>0.90</b> | <0.75       | <0.75       |
| Pb/Mn  | <b>0.79</b> | <0.75       | <b>0.90</b> | <0.75       | <0.75       |
| Pb/Mo  | <b>0.76</b> | <0.75       | <b>0.84</b> | <0.75       | <0.75       |
| Pb/Ni  | <0.75       | <0.75       | <b>0.83</b> | <0.75       | <0.75       |
| Pb/Sb  | <b>0.90</b> | <0.75       | <b>0.82</b> | <0.75       | <0.75       |
| Pb/Se  | <b>0.88</b> | <0.75       | <b>0.90</b> | <0.75       | <0.75       |
| Pb/Tl  | <b>0.78</b> | <0.75       | <b>0.90</b> | <0.75       | <0.75       |
| Pb/U   | <b>0.76</b> | <0.75       | <b>0.85</b> | <0.75       | <0.75       |
| Pb/V   | <0.75       | <0.75       | <b>0.90</b> | <0.75       | <0.75       |
| Pb/W   | <0.75       | <0.75       | <b>0.82</b> | <0.75       | <0.75       |
| Pb/Zn  | <b>0.84</b> | <0.75       | <b>0.91</b> | <0.75       | <0.75       |

Table S8. *Cont.*

| Ratios | AUC values  |         |             |             |             |
|--------|-------------|---------|-------------|-------------|-------------|
|        | LC/HC       | COPD/HC | COPD-LC/HC  | COPD-s/HC   | COPD-vs/HC  |
| Sb/Al  | <0.75       | <0.75   | <0.75       | <0.75       | <b>0.75</b> |
| Sb/As  | <0.75       | <0.75   | <b>0.90</b> | <0.75       | <0.75       |
| Sb/Co  | <0.75       | <0.75   | <0.75       | <0.75       | <b>0.75</b> |
| Sb/Cr  | <0.75       | <0.75   | <0.75       | <0.75       | <b>0.78</b> |
| Sb/Mn  | <0.75       | <0.75   | <b>0.91</b> | <0.75       | <0.75       |
| Sb/Ni  | <0.75       | <0.75   | <0.75       | <0.75       | <b>0.83</b> |
| Sb/Pb  | <0.75       | <0.75   | <b>0.78</b> | <0.75       | <b>0.75</b> |
| Se/As  | <0.75       | <0.75   | <b>0.84</b> | <0.75       | <0.75       |
| Se/Cr  | <b>0.77</b> | <0.75   | <b>0.81</b> | <0.75       | <0.75       |
| Se/Mn  | <0.75       | <0.75   | <b>0.94</b> | <b>0.78</b> | <0.75       |
| Se/Ni  | <b>0.77</b> | <0.75   | <0.75       | <0.75       | <0.75       |
| Se/Pb  | <0.75       | <0.75   | <b>0.88</b> | <0.75       | <0.75       |
| Se/Tl  | <0.75       | <0.75   | <b>0.76</b> | <b>0.79</b> | <0.75       |
| Se/U   | <0.75       | <0.75   | <b>0.80</b> | <0.75       | <0.75       |
| Tl/Al  | <0.75       | <0.75   | <0.75       | <0.75       | <b>0.86</b> |
| Tl/As  | <0.75       | <0.75   | <b>0.81</b> | <0.75       | <0.75       |
| Tl/Cu  | <b>0.77</b> | <0.75   | <0.75       | <b>0.79</b> | <0.75       |
| Tl/Mo  | <0.75       | <0.75   | <0.75       | <0.75       | <b>0.76</b> |
| Tl/Ni  | <0.75       | <0.75   | <b>0.76</b> | <0.75       | <0.75       |
| Tl/Pb  | <0.75       | <0.75   | <b>0.88</b> | <0.75       | <0.75       |
| Tl/Sb  | <b>0.77</b> | <0.75   | <0.75       | <0.75       | <0.75       |
| Tl/Se  | <0.75       | <0.75   | <b>0.76</b> | <b>0.79</b> | <0.75       |
| Tl/Zn  | <b>0.77</b> | <0.75   | <0.75       | <0.75       | <0.75       |
| U/Al   | <0.75       | <0.75   | <0.75       | <0.75       | <b>0.91</b> |
| U/As   | <0.75       | <0.75   | <b>0.82</b> | <0.75       | <b>0.76</b> |
| U/Co   | <0.75       | <0.75   | <0.75       | <0.75       | <b>0.79</b> |
| U/Mn   | <0.75       | <0.75   | <b>0.76</b> | <0.75       | <0.75       |
| U/Mo   | <0.75       | <0.75   | <0.75       | <0.75       | <b>0.81</b> |
| U/Ni   | <0.75       | <0.75   | <b>0.75</b> | <0.75       | <b>0.76</b> |
| U/Pb   | <0.75       | <0.75   | <b>0.82</b> | <0.75       | <b>0.79</b> |
| V/Cd   | <0.75       | <0.75   | <b>0.78</b> | <0.75       | <0.75       |
| V/Ni   | <b>0.76</b> | <0.75   | <0.75       | <0.75       | <0.75       |
| V/Pb   | <0.75       | <0.75   | <b>0.90</b> | <0.75       | <0.75       |
| V/Zn   | <0.75       | <0.75   | <b>0.80</b> | <0.75       | <0.75       |
| W/Al   | <0.75       | <0.75   | <0.75       | <0.75       | <b>0.90</b> |
| W/As   | <0.75       | <0.75   | <b>0.87</b> | <b>0.77</b> | <b>0.79</b> |
| W/Mn   | <0.75       | <0.75   | <b>0.84</b> | <0.75       | <0.75       |
| W/Ni   | <0.75       | <0.75   | <0.75       | <0.75       | <b>0.76</b> |
| W/Pb   | <0.75       | <0.75   | <b>0.78</b> | <0.75       | <b>0.84</b> |
| W/U    | <0.75       | <0.75   | <b>0.75</b> | <0.75       | <0.75       |
| W/Zn   | <0.75       | <0.75   | <0.75       | <0.75       | <b>0.76</b> |
| Zn/As  | <b>0.78</b> | <0.75   | <b>0.84</b> | <0.75       | <0.75       |
| Zn/Co  | <0.75       | <0.75   | <b>0.82</b> | <0.75       | <0.75       |
| Zn/Cr  | <0.75       | <0.75   | <b>0.78</b> | <0.75       | <0.75       |
| Zn/Mg  | <0.75       | <0.75   | <0.75       | <0.75       | <b>0.75</b> |
| Zn/Mn  | <b>0.81</b> | <0.75   | <b>0.97</b> | <b>0.80</b> | <0.75       |
| Zn/Ni  | <0.75       | <0.75   | <0.75       | <b>0.88</b> | <0.75       |
| Zn/Sb  | <0.75       | <0.75   | <b>0.80</b> | <0.75       | <0.75       |
| Zn/Tl  | <b>0.77</b> | <0.75   | <0.75       | <0.75       | <0.75       |
| Zn/U   | <0.75       | <0.75   | <b>0.83</b> | <0.75       | <0.75       |

**Table S9.** Metal-metal Spearman correlations in the studied groups. HC: Healthy control; LC: lung cancer; COPD: chronic obstructively pulmonary disease; COPD-LC: patients who developed LC during the follow-up

| Elements |    | rho   | p-level |
|----------|----|-------|---------|
| HC       |    |       |         |
| Pb       | Al | 0.87  | 0.00    |
| Se       | Zn | 0.69  | 0.00    |
| Pb       | Cd | 0.69  | 0.00    |
| Sb       | Mg | 0.66  | 0.00    |
| Zn       | Cu | 0.66  | 0.00    |
| Zn       | Fe | 0.65  | 0.00    |
| Ni       | Al | 0.63  | 0.00    |
| Zn       | Co | 0.60  | 0.00    |
| Se       | Mg | 0.59  | 0.00    |
| U        | Tl | 0.56  | 0.00    |
| Zn       | Mg | 0.56  | 0.00    |
| Pb       | Ni | 0.55  | 0.00    |
| Cu       | Fe | 0.55  | 0.00    |
| Sb       | Se | 0.55  | 0.00    |
| As       | Al | 0.54  | 0.00    |
| Cu       | Co | 0.54  | 0.00    |
| Sb       | V  | 0.54  | 0.00    |
| Mo       | Mg | 0.54  | 0.00    |
| Cr       | Al | 0.52  | 0.00    |
| Pb       | Cr | 0.52  | 0.00    |
| Ni       | Co | -0.51 | 0.00    |
| Zn       | Ni | -0.53 | 0.00    |
| Cu       | Ni | -0.55 | 0.00    |
| LC       |    |       |         |
| Zn       | Co | 0.66  | 0.00    |
| Mn       | Co | 0.66  | 0.00    |
| Cu       | Mg | 0.65  | 0.00    |
| Cr       | Ni | 0.64  | 0.00    |
| Cd       | As | 0.57  | 0.00    |
| Sb       | Cu | 0.57  | 0.00    |
| Mn       | V  | 0.56  | 0.00    |
| Sb       | Mo | 0.56  | 0.00    |
| Mo       | Cu | 0.55  | 0.00    |
| Cd       | V  | 0.55  | 0.00    |
| Zn       | Cu | 0.55  | 0.00    |
| Zn       | Mn | 0.54  | 0.00    |
| W        | Ni | 0.53  | 0.00    |
| Pb       | Sb | 0.53  | 0.00    |
| Cd       | Se | 0.53  | 0.00    |
| Cu       | Co | 0.52  | 0.00    |
| Cr       | Mg | -0.51 | 0.00    |
| Ni       | Mn | -0.54 | 0.00    |
| Se       | Al | -0.54 | 0.00    |
| Cr       | Co | -0.55 | 0.00    |
| Cu       | Ni | -0.55 | 0.00    |
| V        | Al | -0.55 | 0.00    |
| Mo       | Cr | -0.57 | 0.00    |
| As       | Mg | -0.58 | 0.00    |
| Zn       | Ni | -0.64 | 0.00    |
| Ni       | Co | -0.73 | 0.00    |

Table S9. *Cont.*

| Elements       |           | rho   | p-level |
|----------------|-----------|-------|---------|
| <b>COPD</b>    |           |       |         |
| <b>Se</b>      | <b>Zn</b> | 0.73  | 0.00    |
| <b>As</b>      | <b>Al</b> | 0.70  | 0.00    |
| <b>Cu</b>      | <b>Mg</b> | 0.69  | 0.00    |
| <b>Se</b>      | <b>Mg</b> | 0.67  | 0.00    |
| <b>Cd</b>      | <b>Al</b> | 0.67  | 0.00    |
| <b>Zn</b>      | <b>Mg</b> | 0.65  | 0.00    |
| <b>Se</b>      | <b>Cu</b> | 0.61  | 0.00    |
| <b>Zn</b>      | <b>Cu</b> | 0.54  | 0.00    |
| <b>V</b>       | <b>Al</b> | 0.52  | 0.00    |
| <b>Zn</b>      | <b>Co</b> | 0.51  | 0.00    |
| <b>COPD-LC</b> |           |       |         |
| <b>As</b>      | <b>Mn</b> | 0.85  | 0.00    |
| <b>Zn</b>      | <b>Mn</b> | 0.76  | 0.00    |
| <b>Sb</b>      | <b>Co</b> | 0.74  | 0.01    |
| <b>W</b>       | <b>Cu</b> | 0.73  | 0.01    |
| <b>Sb</b>      | <b>Zn</b> | 0.71  | 0.01    |
| <b>Cu</b>      | <b>V</b>  | 0.68  | 0.01    |
| <b>Sb</b>      | <b>Mo</b> | 0.68  | 0.02    |
| <b>W</b>       | <b>V</b>  | 0.67  | 0.02    |
| <b>Zn</b>      | <b>V</b>  | 0.66  | 0.02    |
| <b>U</b>       | <b>Mo</b> | 0.66  | 0.02    |
| <b>Mn</b>      | <b>V</b>  | 0.63  | 0.03    |
| <b>Sb</b>      | <b>Ni</b> | 0.60  | 0.04    |
| <b>Zn</b>      | <b>Ni</b> | 0.58  | 0.05    |
| <b>Cr</b>      | <b>Al</b> | -0.62 | 0.03    |
| <b>W</b>       | <b>Cd</b> | -0.63 | 0.03    |
| <b>Tl</b>      | <b>Se</b> | -0.69 | 0.01    |
| <b>Cd</b>      | <b>Cu</b> | -0.69 | 0.01    |

**Table S10.** Limit of detection (LOD) and quantification (LOQ) for elements. Limits of detection (LODs) and quantification (LOQs) were calculated with the data generated in the linearity studies as  $LOD = a + 3 Sy/x$  and  $LOQ = a + 10 Sy/x$ , where “a” is the origin ordinate and “Sy/x” the random errors in the values for the slope and intercept.

| Elements (ng g <sup>-1</sup> ) | LOD  | LOQ  |
|--------------------------------|------|------|
| Mg                             | 0.08 | 0.27 |
| Al                             | 0.06 | 0.20 |
| V                              | 0.02 | 0.68 |
| Mn                             | 0.04 | 0.13 |
| Fe                             | 0.05 | 0.17 |
| Co                             | 0.05 | 0.17 |
| Ni                             | 0.04 | 0.13 |
| Cu                             | 0.05 | 0.17 |
| Zn                             | 0.07 | 0.23 |
| Cr                             | 0.04 | 0.13 |
| As                             | 0.03 | 0.10 |
| Mo                             | 0.04 | 0.13 |
| Se                             | 0.03 | 0.10 |
| Cd                             | 0.01 | 0.33 |
| Sb                             | 0.04 | 0.13 |
| W                              | 0.04 | 0.13 |
| Tl                             | 0.02 | 0.68 |
| Pb                             | 0.04 | 0.13 |
| U                              | 0.02 | 0.68 |

**Table S11.** Validation of multielemental analysis by ICP-QQQ-MS using de human serum Seronorm™ Trace Elements Serum L-2 and ClinChek serum control Level II.\*Additional approximate values.

| Elements<br>(n= 10) | ClinChek serum control level II<br>( ng g-1) |         |                 | Seronorm™ Trace Elements Serum L-2<br>(ng g-1) |         |                 |
|---------------------|----------------------------------------------|---------|-----------------|------------------------------------------------|---------|-----------------|
|                     | Average                                      | RSD (%) | Certified range | Average                                        | RSD (%) | Certified range |
| Mg                  | 23818.37                                     | 6.13    | 19400-23700     | 38993.85                                       | 4.10    | 28500-42800     |
| Al                  | 43.84                                        | 5.08    | 43-65           | 78.92                                          | 7.12    | 72-108          |
| V                   | 6.91                                         | 4.37    | 6.47-9.71       | 0.57                                           | 7.07    | 0.52*           |
| Mn                  | 5269.60                                      | 8.66    | 4830-7240       | 13.04                                          | 5.45    | 11.3-17         |
| Fe                  | 1218.55                                      | 7.88    | 1190-1780       | 1772.71                                        | 6.80    | 1650-2490       |
| Co                  | 4.92                                         | 7.22    | 4.59-6.89       | 2.59                                           | 6.70    | 2.15-3.24       |
| Ni                  | 6.13                                         | 6.80    | 4.77-7.15       | 10.77                                          | 1.41    | 7.6-11.4        |
| Cu                  | 1136.70                                      | 6.96    | 1150-1560       | 1689.25                                        | 5.24    | 1737-2613       |
| Zn                  | 1522.34                                      | 10.29   | 1280-1740       | 1687.49                                        | 9.99    | 1670-2510       |
| Cr                  | 5.67                                         | 9.42    | 4.53-6.79       | 3.64                                           | 11.19   | 3.12-4.69       |
| As                  | 15.45                                        | 7.07    | 14.5-24.1       | 1.28                                           | 8.35    | 0.38*           |
| Mo                  | 5.81                                         | 8.63    | 4.33-6.50       | 1.15                                           | 5.53    | 0.91*           |
| Se                  | 95.13                                        | 4.58    | 89.8-135        | 126.40                                         | 5.47    | 111-167         |
| Cd                  | 5.37                                         | 7.06    | 4.04-6.73       | 0.17                                           | 11.29   | 0.122*          |
| Sb                  | 5.86                                         | 1.37    | 5.64-8.46       | 15.26                                          | 8.03    | 16.4*           |
| W                   | 0.40                                         | 1.34    | No certified    | 6.45                                           | 3.46    | No certified    |
| Tl                  | 5.86                                         | 7.37    | 5.59-8.38       | 0.27                                           | 13.07   | No certified    |
| Pb                  | 1.12                                         | 5.51    | No certified    | 1.65                                           | 6.96    | 1.29*           |
| U                   | 1.17                                         | 4.87    | No certified    | 1.86                                           | 0.29    | 0.53*           |

**Table S12.** Operational Conditions of ICP-QQQ-MS

| Operational Conditions     |                                                                                                                                                                                                                                                                                                                                                                                                                                                                          |
|----------------------------|--------------------------------------------------------------------------------------------------------------------------------------------------------------------------------------------------------------------------------------------------------------------------------------------------------------------------------------------------------------------------------------------------------------------------------------------------------------------------|
| Nebulizer                  | Savillex Cross Flow 400                                                                                                                                                                                                                                                                                                                                                                                                                                                  |
| Sampling and skimmer cones | Nickel                                                                                                                                                                                                                                                                                                                                                                                                                                                                   |
| RF Power                   | 1500 W                                                                                                                                                                                                                                                                                                                                                                                                                                                                   |
| Plasma gas flow rate       | 15 L min <sup>-1</sup>                                                                                                                                                                                                                                                                                                                                                                                                                                                   |
| Carrier gas flow rate      | 0.65 L min <sup>-1</sup>                                                                                                                                                                                                                                                                                                                                                                                                                                                 |
| Auxiliary gas flow         | 1 L min <sup>-1</sup>                                                                                                                                                                                                                                                                                                                                                                                                                                                    |
| Sampling depth             | 10 mm                                                                                                                                                                                                                                                                                                                                                                                                                                                                    |
| He flow                    | 4.5 ml min <sup>-1</sup>                                                                                                                                                                                                                                                                                                                                                                                                                                                 |
| H <sub>2</sub> flow        | 2 ml min <sup>-1</sup>                                                                                                                                                                                                                                                                                                                                                                                                                                                   |
| O <sub>2</sub> flow        | 40%                                                                                                                                                                                                                                                                                                                                                                                                                                                                      |
| Dwell time                 | 0.3 per isotope                                                                                                                                                                                                                                                                                                                                                                                                                                                          |
| Torch                      | Shield (with long life platinum shield plate)                                                                                                                                                                                                                                                                                                                                                                                                                            |
| OctP Bias                  | -18.0 V                                                                                                                                                                                                                                                                                                                                                                                                                                                                  |
| OctP RF                    | 190 V                                                                                                                                                                                                                                                                                                                                                                                                                                                                    |
| Energy Discrimination      | -7.0 V                                                                                                                                                                                                                                                                                                                                                                                                                                                                   |
| Isotopes monitored         | <sup>24</sup> Mg, <sup>27</sup> Al, <sup>51</sup> V, <sup>45</sup> Sc, <sup>55</sup> Mn, <sup>57</sup> Fe, <sup>59</sup> Co, <sup>53</sup> Cr, <sup>60</sup> Ni, <sup>63</sup> Cu, <sup>65</sup> Cu, <sup>64</sup> Zn, <sup>66</sup> Zn, <sup>75</sup> As, <sup>78</sup> Se, <sup>80</sup> Se, <sup>95</sup> Mo, <sup>103</sup> Rh, <sup>112</sup> Cd, <sup>114</sup> Cd, <sup>182</sup> W, <sup>205</sup> Tl, <sup>208</sup> Pb, <sup>209</sup> Bi and <sup>238</sup> U |
| Replicates                 | 5                                                                                                                                                                                                                                                                                                                                                                                                                                                                        |

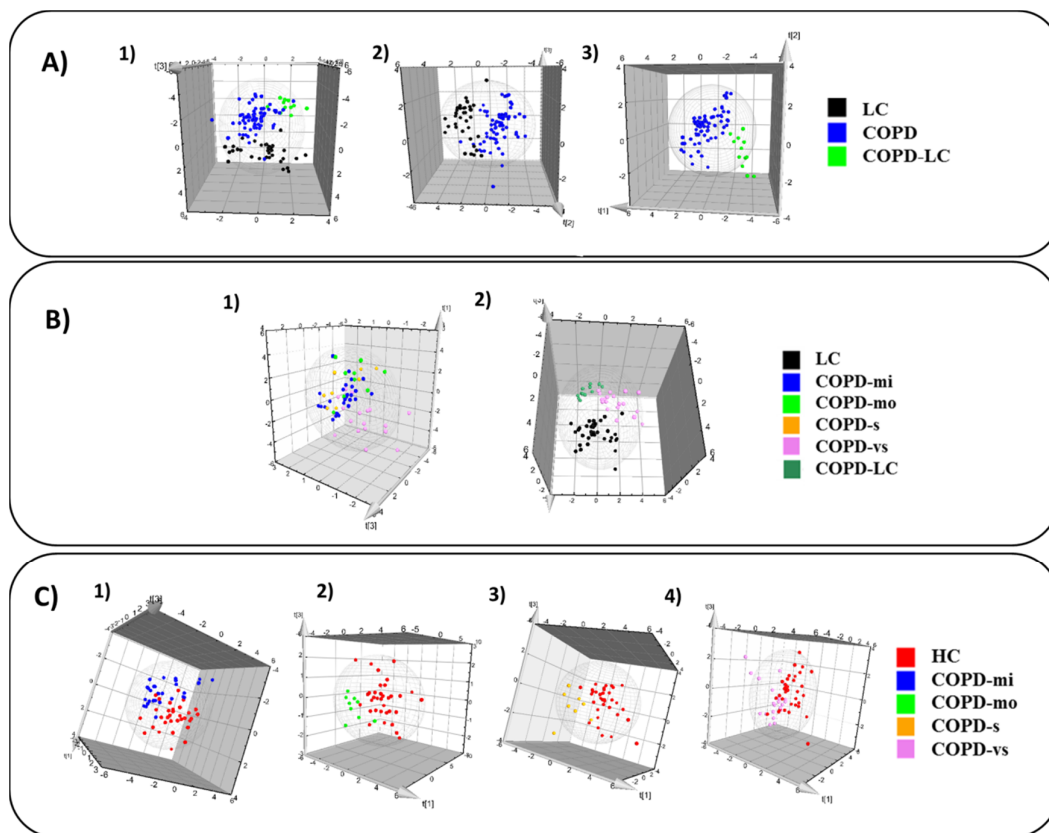

**Figure S1.** PLS-DA plots of metal human serum comparison between (A) COPD, LC and COPD-LC groups (1); LC and COPD groups (2) and COPD and COPD-LC groups, (B) COPD-mi, COPD-mo, COPD-s and COPD-vs (1) and COPD-vs, LC and COPD-LC groups (2), (C) HC and COPD-mi (1), HC and COPD-mo(2), HC and COPD-s (3), HC and COPD-vs (4) groups. HC: Healthy control; LC: lung cancer; COPD: chronic obstructively pulmonary disease; COPD-LC: patients who developed LC during the follow-up; COPD-vs: very severe COPD; COPD-s: severe COPD, COPD-mo: moderate COPD and COPD-mi: mild COPD.



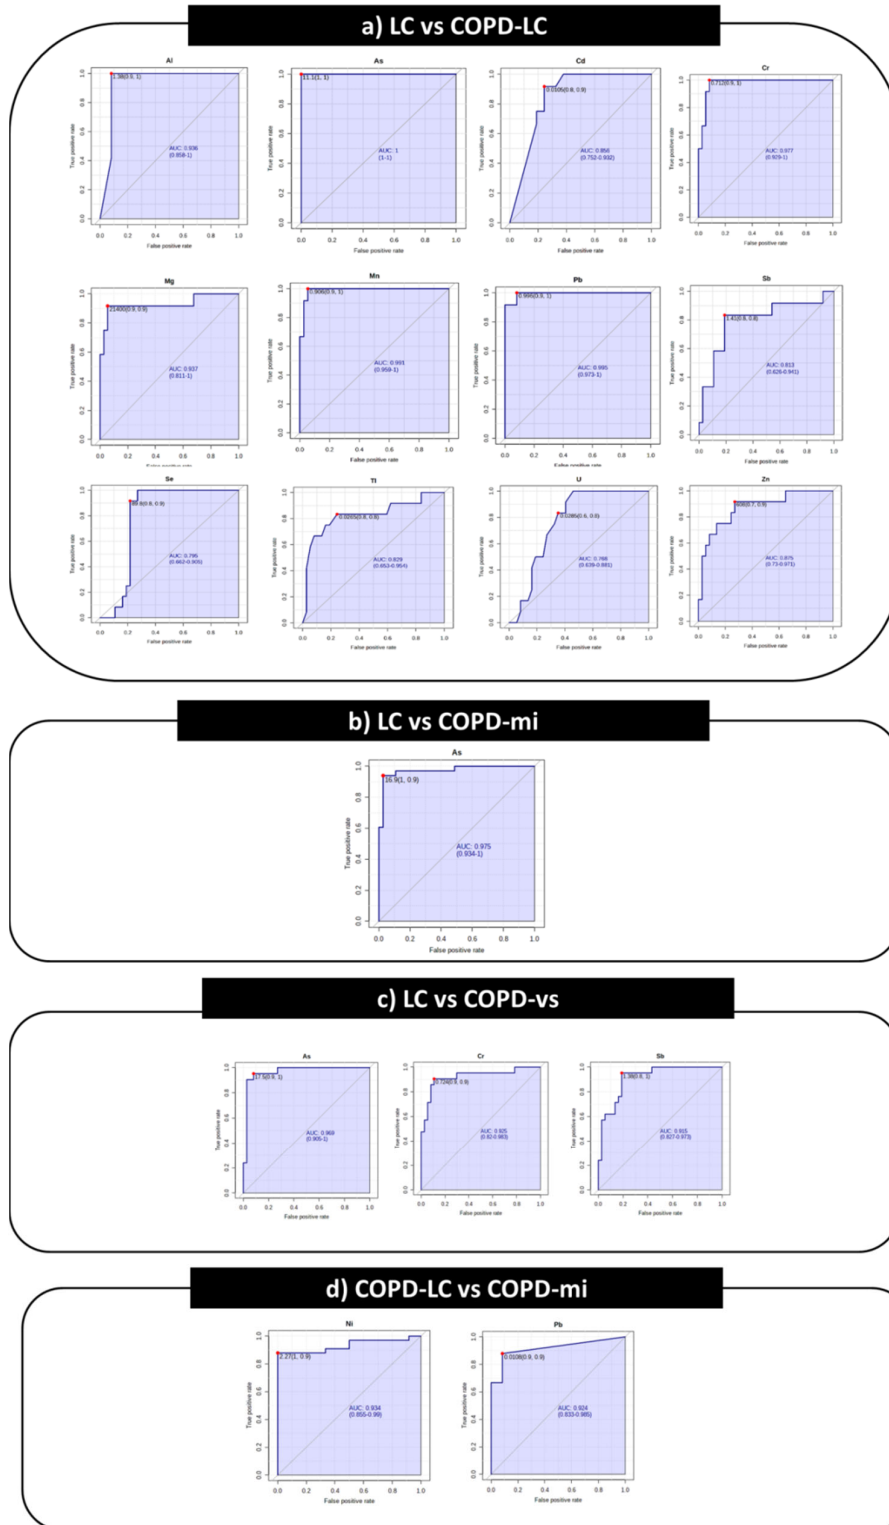

**Figure S2.** ROC curves corresponding to the elements that presented significant differences between (a) LC and COPD-LC groups, (b) LC and COPD-mi, (c) LC and COPD-vs and d) COPD-LC and COPD-mi considering good values of specificity and specificity AUC values higher than 0.75. The rest of the comparison showed AUC values < 0.75.
